# Supplementary material for: A Basic Review of the Preliminary Evidence That COVID-19 Risk and Severity Is Increased in Vitamin D Deficiency
Source: PubMed Central journal article supplement (PMC7513835; doi:10.3389/fpubh.2020.00513), 2020-09-10
Supplement: Table_1.pdf [file Table_1.pdf]

| <b>Table A1: In Vitro Studies and Brief Perspectives with Summaries of Pertinent Previously Published Data (141 entries)</b> |                                                                                                                                               |                                     |                                                                                                           |
|------------------------------------------------------------------------------------------------------------------------------|-----------------------------------------------------------------------------------------------------------------------------------------------|-------------------------------------|-----------------------------------------------------------------------------------------------------------|
| 1st Author /Location                                                                                                         | Title (Truncated)                                                                                                                             | Supporting Information* /# of pages | Recommendation for Covid-19 & D (dose-who-why)                                                            |
| Adams/ USA                                                                                                                   | Myth Busters: Dietary Supplements and COVID-19(1)                                                                                             | R,J,C<br>7 pages                    | 600-4000IU/day – all adults - R                                                                           |
| Alabada/ Iraq                                                                                                                | Vitamin D effectiveness and pathology in humans and domestic animals(2)                                                                       | C<br>15 pages                       | None - Covid-19 barely mentioned                                                                          |
| Álvarez-López /Mexico                                                                                                        | Vitamin D y la pandemia por Covid-19 ( Vitamin D and the pandemic of Covid-19)(3)                                                             | P,R,F,J,C<br>6 pages                | 10- 25 mcg/day - high risk – D, Goal = 30 ng/ml                                                           |
| Anderson/ UK & USA                                                                                                           | Covid-19 Pathophysiology: Interactions of Gut Microbiome, Melatonin, Vitamin D, Stress, Kynurenine... Nicotinic ... Treatment Implications(4) | P,R,F,J,C,S<br>24 pages             | Vitamin D supplements - no details provided                                                               |
| Annweiler /France & China                                                                                                    | Counter-regulatory ‘Renin-Angiotensin’ System-... Drugs to Treat COVID-19 ...infected patients(5)                                             | F,C,S<br>2 pages                    | RAS regulators to treat Covid-19 - no vitamin D mention                                                   |
| Alpalhão/ Portugal                                                                                                           | SARS-CoV-2 pandemic and Vitamin D deficiency—A double trouble(6)                                                                              | D,R,F<br>2 pages                    | 20-40 min sun/day; 10-50mcg/day; test (more if deficient)                                                 |
| Arboleda-Alzate/ Columbia                                                                                                    | Vitamin D supplementation: a potential approach for COVID-19 therapeutics(7)                                                                  | G,R,F,C,S<br>9 pages                | “Conventional” oral vitamin D supplementation                                                             |
| Ardiaria/ Indonesia                                                                                                          | Peran vitamin d dalam pencegahan influenza dan covid-19(8)                                                                                    | P,R,C,J<br>7 pages                  | Clinical trials are needed urgently                                                                       |
| Arya/ India                                                                                                                  | Synergistic effect of Vitamin D and Remdesivir can fight COVID-19(9)                                                                          | R,C,<br>4 pages                     | D plus Remdesivir should be trialed                                                                       |
| Aslan/ Turkey                                                                                                                | Is vitamin D one of the key elements in Covid-19 days?(10)                                                                                    | D,G,P,R,C,S<br>2 pages              | Supplement entire population                                                                              |
| Aygun/ Turkey                                                                                                                | Vitamin D can prevent COVID-19 infection-induced multiple organ damage(11)                                                                    | G,R,C,S<br>4 pages                  | Supplement due to R,F                                                                                     |
| Bakare/ UK                                                                                                                   | A cost-effective preventative approach to ...save lives ...using Vitamin D, Curcumin, ... Vitamin C(12)                                       | R,C,<br>7 pages                     | Supplement with no added calcium                                                                          |
| Barazzoni/ Italy, Israel, Germany, Denmark, Russia, Croatia                                                                  | ESPEN expert statements and practical guidance for nutritional management of individuals with SARS-CoV-2 infection(13)                        | R<br>9 pages                        | Screen at-risk populations and patients for malnutrition, including vitamin D, and supplement accordingly |
| Barron/ UK                                                                                                                   | Vitamin D: A rapid review of the evidence for treatment or prevention of COVID-19 in adults (excluding pregnant & breastfeeding women)(14)    | P,R<br>10 pages                     | Those at risk of deficiency should take 400IU/day                                                         |
| Bauer/                                                                                                                       | What is the role of supplementation with                                                                                                      | D,P,R,C,                            | No known risks,                                                                                           |

|                                                                                                                |                                                                                                                                                 |                                |                                                                                      |
|----------------------------------------------------------------------------------------------------------------|-------------------------------------------------------------------------------------------------------------------------------------------------|--------------------------------|--------------------------------------------------------------------------------------|
| USA                                                                                                            | ascorbic acid, zinc, vitamin D, or N-acetylcysteine for prevention or treatment of COVID-19?(15)                                                | 3 pages                        | but recommend D only after RCTs                                                      |
| Belančić /Croatia                                                                                              | Potential pathophysiological mechanisms leading to increased COVID-19 ... in obesity(16)                                                        | D,P,R,C,<br>3 pages            | Measure D and supplement obese                                                       |
| Biesalski/ Germany                                                                                             | Vitamin D deficiency and co-morbidities in COVID-19 patients – A fatal relationship?(17)                                                        | D,G,P,R,F,C,J,<br>T,S 13 pages | D prevents storm Supplement                                                          |
| Bloukh/ UAE, India                                                                                             | Prevalence of COVID-19: A Look behind the Scenes(18)                                                                                            | D,P,R,C<br>18 pages            | Prophylactically supplement if low                                                   |
| Brown/ UK, India                                                                                               | Vitamin D deficiency: a factor in COVID-19 progression severity and mortality? An urgent call for research(19,20)                               | D,G,P,R,F,C<br>29 pages        | Urgent call for research, possible supplementation                                   |
| Brown / UK                                                                                                     | Rapid Response: Re: Preventing a covid-19 pandemic - COVID-19: Vitamin D deficiency; and, death rates; ... connection? Research urgently...(21) | D,G,P<br>4 pages               | Urgent call for research, possible supplementation                                   |
| Brown/ UK, India, Philippines, Austria, France, Australia, Ireland, Canada, Italy, USA, Sweden, Greece, Turkey | COVID-19 ICU risk – 20-fold greater in the Vitamin D Deficient... Sun and D-supplementation – Game-changers? Research urgently required(22)     | P,R,C,J,S<br>6 pages           | Urgent call for research, correct deficiencies                                       |
| Buttriss/ UK                                                                                                   | Is a vitamin D fortification strategy needed?(23)                                                                                               | D,R<br>8 pages                 | 400IU/day due to staying indoors                                                     |
| Caccialanza/ Italy                                                                                             | Early nutritional supplementation in non-critically ill patients hospitalized for ...(COVID-19): protocol(24)                                   | R,C<br>5 pages                 | Correct deficiency aggressively                                                      |
| Calder/UK, USA, New Zealand, The Netherlands                                                                   | Optimal Nutritional Status for a Well-Functioning Immune System Is an Important Factor to Protect against Viral Infections(25)                  | D,R,<br>10 pages               | All adults should take 2000 IU of vitamin D/day, US National Academy recommendations |
| Cao/China , France                                                                                             | SARS-CoV-2 & Covid-19: Key-Roles of the 'Renin-Angiotensin' System / Vitamin D Impacting ...(26)                                                | P,R,F,C,S<br>2 pages           | Take note: vitamin D is crucial                                                      |
| Carter /USA                                                                                                    | Considerations for Obesity, Vitamin D, and Physical Activity Amid the COVID-19 Pandemic(27)                                                     | P,R,C,S<br>2 pages             | Encourage outdoor activities, give D                                                 |
| Chakhtoura/Italy, USA, Lebanon                                                                                 | Commentary: Myths and facts on vitamin D amidst the COVID-19 pandemic(28)                                                                       | G,D,R,C,<br>3 pages            | Supplement with 1000-4000IU/day to achieve >30ng/ml 25(OH)D                          |
| Chan/ Hong Kong                                                                                                | What can we do for the Personal Protection against the CoVID-19 infection? Immuno-boosting(29)                                                  | R,C<br>6 pages                 | Supplement with vitamin D, herbals                                                   |

|                                                                                |                                                                                                                                                           |                              |                                                                                 |
|--------------------------------------------------------------------------------|-----------------------------------------------------------------------------------------------------------------------------------------------------------|------------------------------|---------------------------------------------------------------------------------|
| Chhetri/<br>China,<br>Indonesia,<br>Japan,<br>Korea,<br>Thailand,<br>Sri Lanka | Prevention of covid-19 in older adults: A brief guidance from The International Association for Gerontology and Geriatrics (IAGG) Asia/Oceania Region(30) | R<br>2 pages                 | Get enough sunlight “in the morning” for vitamin D production                   |
| Crane-<br>Godreau/<br>USA                                                      | Vitamin D Deficiency and Air Pollution Exacerbate COVID-19 Through Suppression of Antiviral Peptide LL37(31)                                              | D,G,P,R,F,C,<br>5 pages      | Deficiency + air pollution is trouble<br>Daily dose is best                     |
| Dasgupta<br>/ India                                                            | Nsp7 and Spike Glycoprotein of SARS-CoV-2 ...Potential Targets of Vitamin D and Ivermectin(32)                                                            | R,C,<br>13 pages             | D may dock onto virus, be curative                                              |
| De Lucena<br>/Brazil                                                           | Mechanism of inflammatory response in associated comorbidities in COVID-19(33)                                                                            | R,C,S<br>4 pages             | D can decrease complications                                                    |
| Dhillon/<br>UK                                                                 | COVID-19 breakthroughs: separating fact from fiction(34)                                                                                                  | P,R,<br>37 pages             | Evidence is weak<br>But, supplement                                             |
| Docea/<br>USA,<br>Greece,<br>Romania,<br>Russia                                | A new threat from an old enemy: Re-emergence of coronavirus (Review)(35)                                                                                  | R,C<br>13 pages              | Evidence is weak, but biologically plausible Try D for prevention and treatment |
| Ebadi/<br>Canada                                                               | Perspective: improving vitamin D status in the management of COVID-19(36)                                                                                 | G,P,R,C,S<br>4 pages         | Very plausible<br>High doses for pts.                                           |
| Ekiz/<br>Turkey                                                                | Relationship between COVID-19 and obesity(37)                                                                                                             | P,R,C<br>3 pages             | Plausible link<br>Supplement                                                    |
| Ekiz/<br>Turkey                                                                | Revisiting vitamin D and ... exercises for patients with sleep apnea ... the COVID-19 quarantine(38)                                                      | P,R<br>6 pages               | 10,000IU/day x1mo<br>then 5000IU/day                                            |
| Fabbri/US<br>A, Italy                                                          | Editorial – Vitamin D status: a key modulator of innate immunity and natural defense ...(39)                                                              | D,R,C<br>5 pages             | Up to 6000IU/day<br>Goal: 30 - 60ng/ml                                          |
| Facchiano<br>/Italy, USA                                                       | Reply to Jakovac: About COVID-19 and vitamin D (In support of Jakovac)(40)                                                                                | R,C,S<br>1 page              | No doubt<br>Conduct trials, give                                                |
| Farias/<br>Brazil                                                              | Vitamin D as an Immunological Factor in Combating COVID-19(41)                                                                                            | D,P,R,C<br>10 pages          | Immune benefits<br>Eat fish and eggs                                            |
| Froom/<br>USA                                                                  | Vitamin D and COVID 19 disease severity: An old ally in a new war(42)                                                                                     | R,C,J,<br>5 pages            | Dentists should test, supplement                                                |
| Garami/S<br>witzerland                                                         | Re: Preventing a covid-19 pandemic - Is there a magic bullet to save patients?... give it a try!(43)                                                      | D,G,C,S<br>3 pages           | Biological plausibility, give D!                                                |
| Garg/UK,<br>Australia                                                          | Editorial: low population mortality from COVID-19 ... latitude 35 degrees North—supports vitamin D as a factor determining severity. Authors' reply(44)   | D – denies others<br>2 pages | Premature, but for musculoskeletal health, give D                               |
| Gasmi/<br>Iran,<br>Pakistan,<br>Norway,<br>Thailand,                           | Individual risk management strategy and potential therapeutic options for the COVID-19 pandemic(45)                                                       | D,P,R<br>9 pages             | vitamin D prevents infections when given prior to exposure<br>Goal 40-60ng/ml   |

|                                                                                                                          |                                                                                                                                             |                                                                          |                                                             |
|--------------------------------------------------------------------------------------------------------------------------|---------------------------------------------------------------------------------------------------------------------------------------------|--------------------------------------------------------------------------|-------------------------------------------------------------|
| Luxembourg, France                                                                                                       |                                                                                                                                             |                                                                          | 10,000IU/day x1mo then 5000IU/day                           |
| Gee/UK                                                                                                                   | Management of clozapine treatment during the COVID-19 pandemic(46)                                                                          | D,P,R,C<br>10 pages                                                      | D decreases risk<br>Supplement                              |
| Ghavidel-darestani/Iran                                                                                                  | Role of vitamin D in pathogenesis and severity of COVID-19 infection(47)                                                                    | D,P,R,C,S<br>16 pages                                                    | Biological plausibility<br>D for all deficient              |
| Glinsky/USA                                                                                                              | Tripartite Combination of ... Pandemic Mitigation Agents: Vitamin D, Quercetin, and Estradiol(48)                                           | D,R,C,S<br>26 pages                                                      | The 3 listed agents should be given                         |
| González/Puerto Rico                                                                                                     | 2020 Covid-19 Protocol(49)                                                                                                                  | R,F<br>9 pages                                                           | Support immune system: 10,000IU/d<br>Infected: 25,000IU     |
| Grant/USA, Hungary                                                                                                       | Evidence that Vitamin D Supplementation Could Reduce Risk of Influenza and COVID-19 Infections And Deaths(50)                               | R,F,C,S<br>(full review)<br>19 pages                                     | Evidence is strong<br>Goal:40-60ng/ml<br>2000-5000IU+ daily |
| Grant/USA, Hastie/UK                                                                                                     | Letter in response to the article: Vitamin D concentrations and COVID-19 infection in UK biobank (Hastie et al.) and Response to letter(51) | Debate - see section 1.1<br>2 pages                                      | Researchers of differing views fail to communicate          |
| Grant/USA                                                                                                                | Reply: "Vitamin D Supplementation in Influenza and COVID-19 Infections. Comment on: Evidence ..."(52)                                       | See section 1.2, 5 pages                                                 | Response to Kow softened D dose                             |
| Guan/USA, China, Australia, Brazil, UK, Korea, South Africa, Sweden, Morocco, Russia, Mexico, Canada, Netherlands, Chile | Promoting healthy movement behaviours among children during the COVID-19 pandemic(53)                                                       | Vitamin D mentioned in passing only, assumed to be beneficial<br>3 pages | Children need to play outdoors                              |
| Gupta/India                                                                                                              | Is Immuno-modulation the Key to COVID-19 Pandemic?(54)                                                                                      | R,C<br>4 pages                                                           | D helps immunity<br>BCG vaccine                             |
| Hamad/Sudan                                                                                                              | Vitamin D Supplements Improve Efficacy of Minocycline...Triple Therapy to COVID-19 ...(55)                                                  | R,C<br>2 pages                                                           | Improves immune<br>Add D to treatment                       |
| Hasan/Saudi Arabia, Qatar, UAE, Iran, Iraq                                                                               | A review on the cleavage priming of the spike protein on coronavirus by angiotensin-converting enzyme-2 and furin (56)                      | S<br>9 pages                                                             | D can inhibit ACE-2 therefore could be therapeutic          |
| Heiser/USA                                                                                                               | Identification of potential treatments for COVID-19 through artificial intelligence-enabled ...analysis of                                  | P,C<br>15 pages                                                          | Weak effect in D analogues – study                          |

|                                                    |                                                                                                                                   |                           |                                                                                        |
|----------------------------------------------------|-----------------------------------------------------------------------------------------------------------------------------------|---------------------------|----------------------------------------------------------------------------------------|
|                                                    | human cells infected with SARS-CoV-2(57)                                                                                          |                           | for new drugs                                                                          |
| Hossain/B<br>angladesh                             | Natural Polyphenol ... Crops based Diet to Promote Innate Immunity to Combat Covid-19 Disease(58)                                 | R,C<br>22 pages           | Polyphenols + D<br>enhance immunity                                                    |
| Hribar/UK,<br>USA                                  | Potential Role of Vitamin D in the Elderly to Resist COVID-19 and to Slow ... Parkinson's Disease(59)                             | D,P,R,F,C,J,S?<br>8 pages | Enhances immunity<br>2000-5000IU/day                                                   |
| Isaia / Italy                                      | Possible prevention and therapeutic role of vitamin D in ... the COVID-19 2020 pandemics(60)                                      | D,G,P,R,C,J,              | Enhances immunity<br>Lit. review only                                                  |
| Islam<br>/Germany                                  | A transcriptome analysis identifies potential preventive 1 and therapeutic 2 approaches ...(61)                                   | C,<br>21 Pages            | Improves immune<br>Give D + ketogenic                                                  |
| Jakovac<br>/Croatia                                | COVID-19 and vitamin D—Is there a link and an opportunity for intervention?(62)                                                   | R,C<br>1 page             | D link is intriguing<br>D now – no harm                                                |
| Jayawarde<br>na/Greece<br>Sri Lanka,<br>Australia  | Enhancing Immunity in Viral Infections, with special emphasis on COVID-19: A Review(63)                                           | D,R,C,<br>59 pages        | supplementation of<br>vitamins for Covid-<br>19 is appropriate,<br>especially D 5000IU |
| Jukic/<br>Croatia,<br>Spain,                       | Strategies and Solutions for Team Sports Athletes in Isolation due to COVID-19(64)                                                | No details<br>9 pages     | Educate about<br>nutrition<br>Give D                                                   |
| Kakodkar/<br>Ireland                               | A Comprehensive Literature Review on the Clinical Presentation, and Management ... (COVID-19)(65)                                 | R,<br>18 pages            | Prophylaxis and<br>treatment                                                           |
| Kalantar-<br>Zadeh/<br>USA                         | Impact of Nutrition and Diet on COVID-19 Infection ..Implications for Kidney Health ...(66)                                       | No details<br>4 pages     | Improves overall<br>health                                                             |
| Kamani/<br>Iran                                    | Effect of Low Level Yellow Laser Light 589nm on Virus Prevention Corona Virus (COVID-19)(67)                                      | R<br>4 pages              | Use their device to<br>increase D                                                      |
| Khalil/Ban<br>gladesh                              | Sub-continental Atmosphere and Inherent Immune System ... Impact ...Covid-19... South East Asia(68)                               | R<br>9 pages              | Influences immune<br>Get vitamin D (sun)                                               |
| Khunti/UK<br>, India                               | Is ethnicity linked to incidence or outcomes of covid-19?(69)                                                                     | P<br>3 pages              | D one of many<br>possible reasons                                                      |
| Koenig/<br>USA, Iran,<br>China,<br>Saudi<br>Arabia | Ways of Protecting Religious Older Adults from the Consequences of COVID-19(70)                                                   | P,R<br>9 pages            | D is often deficient<br>in elderly, needed<br>for immunity<br>Take supplements         |
| Kow/ UK,<br>Malaysia                               | Vitamin D ...in Influenza and COVID-19 Infections Comment on: "Evidence that Vitamin D ..." (71)                                  | Rationale OK<br>2 pages   | High dose lacks<br>evidence – trials 1 <sup>st</sup>                                   |
| Kumar/<br>India                                    | Letter: does vitamin D have a potential role against COVID-19? (Comment on Tian, et al.)(72)                                      | R,C,S<br>2 pages          | D has two roles                                                                        |
| Kurthkoti/<br>India                                | Potential benefits of Vitamin D supplementation in COVID-19 patients. A Hypothesis(73)                                            | G,R,C<br>4 pages          | Influences immune<br>Supplement all                                                    |
| La Vignera<br>/ Italy                              | Sex-Specific SARS-CoV-2 Mortality: Among Hormone-Modulated ACE2 Expression, Risk of ... Thromboembolism and Hypovitaminosis D(74) | D,P,C,T,S<br>6 pages      | D explains high<br>male mortality &<br>thrombosis                                      |
| Lanham-<br>New/                                    | Vitamin D and SARS-CoV-2 virus/COVID-19 disease(75)                                                                               | D,P,R,<br>5 pages         | D is important, but<br>risks are great                                                 |

|                                 |                                                                                                                                                             |                        |                                                           |
|---------------------------------|-------------------------------------------------------------------------------------------------------------------------------------------------------------|------------------------|-----------------------------------------------------------|
| USA, UK                         |                                                                                                                                                             |                        | RDA or max 4000IU                                         |
| Lawton/<br>USA                  | Will warmer spring weather slow down the rate of spread?(76)                                                                                                | G,R<br>1 page          | D helps immunity                                          |
| Lee /UK                         | Vitamin D:A rapid review of the evidence for treatment or prevention in Covid-19(77)                                                                        | D,G,P,R<br>10 pages    | No evidence found<br>Take RDA                             |
| Manson/<br>USA                  | Does Vitamin D Protect Against COVID-19?(78)                                                                                                                | R,P,C,<br>1 page       | Strong evidence<br>1000-2000IU                            |
| Mansur/<br>USA                  | Letter: low ...mortality from COVID-19 in countries south of latitude...vitamin D ...(reply to Rhodes) (79)                                                 | R,C,S<br>1 page        | Additional info<br>Supports vitamin D                     |
| Martín<br>Giménez/<br>Argentina | Lungs as target of COVID-19 infection: Protective ... molecular mechanisms of vitamin D and melatonin ... new potential synergistic treatment(80)           | D,P,R,J,C,S<br>8 pages | Detailed biological<br>plausibility data<br>D + melatonin |
| Maruta/<br>Australia            | PAK1-blockers: Potential Therapeutics against COVID-19(81)                                                                                                  | S<br>6 pages           | Use MART-10, a<br>derivative with D3                      |
| McCartney /<br>Ireland          | Optimisation of Vitamin D Status for Enhanced Immuno-protection Against Covid-19(82)                                                                        | D,P,R,C<br>4 pages     | 800-2000IU/day -<br>all adults - R                        |
| McCartney /<br>Ireland          | Authors of Article 'Optimisation of Vitamin D Status ... comment on response ... by McKenna et al(83)                                                       | D,P,<br>5 pages        | 800-2000IU/day -<br>all adults - R                        |
| McCartney /<br>Ireland          | Authors of Article 'Optimisation of Vitamin D Status ... comment on response ... by Rabbitt et al(84)                                                       | D,R,<br>3 pages        | Biological<br>Plausibility                                |
| McCullough<br>h/ USA            | The Essential Role of Vitamin D in the Biosynthesis ...Antimicrobial Peptides May Explain ...Deficiency Increases Mortality Risk in COVID-19 Infections(85) | G,P,R<br>23 pages      | A plethora of data<br>from other illness<br>10,000IU+/day |
| McKenna/<br>Ireland             | Covid-19, Cocooning and Vitamin D Intake Requirements(86)                                                                                                   | D,P,R<br>6 pages       | NOT 800-2000IU!!!<br>Goal: 10ng/ml                        |
| Meftahi/<br>Iran                | The possible pathophysiology mechanism of cytokine storm in elderly adults with COVID-19 infection: the contribution of "inflammation-aging"(87)            | P,R,F,C,S<br>15 pages  | Deficiency is a<br>likely cause of<br>cytokine storm      |
| Merow/<br>USA                   | Seasonality and uncertainty in COVID-19 growth rates(88)                                                                                                    | R<br>27 pages          | Increases<br>resistance                                   |
| Misra/ UK,<br>India,<br>Ukraine | Rheumatologists' perspective on coronavirus disease 19 (COVID-19) and potential therapeutic targets(89)                                                     | R,F,C<br>8 pages       | Prevent & mitigate<br>High dose to<br>correct if <50ng/ml |
| Mitchell/<br>UK                 | Vitamin-D and COVID-19: do deficient risk a poorer outcome?(90)                                                                                             | R,C,S<br>1 page        | Influences immune<br>Correct deficiency                   |
| Molloy/<br>Ireland              | Vitamin D, Covid-19 and Children(91)                                                                                                                        | D,G,P,R,C<br>3 pages   | Influences immune<br>Correct deficiency                   |
| Muscogiuri /<br>Italy           | Nutritional recommendations for CoVID-19 quarantine(92)                                                                                                     | D,R,J,C<br>2 pages     | Change diet and<br>eat D-rich foods                       |
| Muscogiuri /<br>Italy           | Obesity: the "Achilles heel" for COVID-19?(93) (obesity research study, vitamin D in discussion)                                                            | D,P,R,C<br>12 pages    | Obesity-related D<br>deficiency fatal?                    |
| Musselwhite /<br>UK             | JTH editorial v17 – The importance of psychosocial factors in transport and health(94)                                                                      | No mention<br>2 pages  | Higher D with<br>public transport                         |
| Nigro/<br>Italy,                | Molecular mechanisms involved in the positive effects of physical activity on coping with COVID-                                                            | P,R,J,C,<br>32 pages   | Encourage physical<br>activity, following                 |

|                                                                         |                                                                                                                                                          |                          |                                                                      |
|-------------------------------------------------------------------------|----------------------------------------------------------------------------------------------------------------------------------------------------------|--------------------------|----------------------------------------------------------------------|
| China, UK, Denmark                                                      | 19(95)                                                                                                                                                   |                          | guidelines. This will increase D                                     |
| Nikhra / India                                                          | Identifying Patterns in Covid-19: Morbidity, Recovery, and the Aftermath(96)                                                                             | P,R,F<br>9 pages         | D supplementation may help prevent                                   |
| Nizami/ India                                                           | Strong Immunity- A Major Weapon to Fight against Covid-19(97)                                                                                            | R,<br>8 pages            | Correct deficiency for immune health                                 |
| Pal / India                                                             | Managing common endocrine disorders amid COVID-19 pandemic(98)                                                                                           | G,P,R,C,F,S<br>5 pages   | Speculation; Bone health: 800-1000IU                                 |
| Palmer / Italy, UK, Sweden, Finland, Spain, Switzerland, France, Greece | The potential long-term impact of the COVID-19 outbreak on patients with non-communicable diseases in Europe: consequences for healthy ageing(99)        | P,R,<br>6 pages          | D deficiency is a concern; immune                                    |
| Parvin/Bangladesh                                                       | The symptoms, contagious process, prevention and post treatment of Covid-19(100)                                                                         | P<br>25 pages            | Sunlight and daily supplements                                       |
| Pinnock/ UK                                                             | Vitamin D and COVID-19. The Evidence Warrants Discussion!(101)                                                                                           | G,R,C<br>5 pages         | Immune benefits 1000-2000IU                                          |
| Queiroz / Brazil                                                        | Management of inflammatory bowel disease patients ...COVID-19 pandemic...: a Brazilian ... (102)                                                         | R<br>6 pages             | Immune benefits Always supplement                                    |
| Quesada-Gomez/ Spain, Belgium                                           | Vitamin D Receptor stimulation to reduce Acute Respiratory Distress Syndrome (ARDS) in patients with Coronavirus SARS-CoV-2 infections(103)              | D,P,R,C,T,S,<br>23 pages | Prevents infection Controls immune Calcifediol is best absorbed form |
| Rabbitt/ Ireland                                                        | Vitamin D and Covid-19: A Note of Caution (response to McCartney, Optimisation of ... D)(104)                                                            | (none)<br>2 pages        | D is safe but need RCTs first                                        |
| Ramos/ Brazil                                                           | COVID-19, Rate of Case Factors and Nutritional Characteristics of ...Dying in Italy and Brazil: ... (105)                                                | D,P,R,C,F,<br>9 pages    | Immune benefits 50,000IU/week                                        |
| Raymond/ UK                                                             | Mast cell stabilisers, leukotriene antagonists and antihistamines: ... evidence ... use in COVID-19(106)                                                 | R,C<br>6 pages           | No evidence of a D Covid-19 link                                     |
| Razdan / India                                                          | Vitamin D Levels and COVID-19 Susceptibility: Is there any Correlation?(107)                                                                             | D,R,C<br>3 pages         | Clear Covid-19 link 2000-4000IU/day                                  |
| Rhodes/ UK                                                              | Letter: low population mortality from COVID-19 ...south of latitude 35° North supports vitamin D as a factor ...severity—authors' reply (to Mansur)(108) | S,T<br>2 pages           | Circumstantial evidence is strong South: supplement                  |
| Ribeiro/ Brazil, UK, Australia                                          | Does Vitamin D play a role in the management of Covid-19 in Brazil? (Building upon Isaia literature review)(109)                                         | D,P,R,<br>6 pages        | Enhances Immunity Get more sun. Do not take 10,000IU                 |
| Richards/ South Africa                                                  | COVID-19 and the Rationale for Pharmacotherapy: A South African Perspective(110)                                                                         | S<br>7 pages             | 50,000IU stat for acute treatment 4000IU/day if mild                 |
| Richer/ USA                                                             | How to build a lifestyle and nutritional firewall against viruses like COVID 19(111)                                                                     | D,P,R<br>5 pages         | Enhances Immunity D in multivitamin                                  |

|                                 |                                                                                                                                                 |                             |                                                                             |
|---------------------------------|-------------------------------------------------------------------------------------------------------------------------------------------------|-----------------------------|-----------------------------------------------------------------------------|
| Rocha/UK, Portugal              | Reply to Jakovac; Severity of COVID-19 infection in patients with phenylketonuria: is vitamin D status protective? (In support of Jakovac)(112) | P,R<br>2 pages              | Enhances Immunity<br>PKU supplement<br>Supplement all                       |
| Romano / Italy                  | Short Report – Medical nutrition therapy for critically ill patients with COVID-19(113)                                                         | (none)<br>5 pages           | Correct <12.5ng/ml<br>(IV cholecalciferol)                                  |
| Roy/ UK                         | Response to ‘Vitamin D concentrations and COVID-19 infection in UK Biobank’ (Hastie)(114)                                                       | R,F,J,<br>1 page            | Enhances Immunity<br>Better research!                                       |
| Rusciano/ Italy                 | The Fight against COVID-19: The Role of Drugs and Food Supplements(115)                                                                         | D,P,R,J,C<br>16 pages       | Enhances Immunity<br>eat well                                               |
| Saul/ USA                       | Nutritional Treatment of Coronavirus(116)                                                                                                       | (none)<br>9 pages           | 5000IU/day x 2<br>weeks then 2000IU                                         |
| Sharma/ India                   | Vitamin D: A cheap yet effective bullet against coronavirus disease-19 – Are we convinced yet?(117)                                             | D,G,P,R,F,C,J,<br>S 8 pages | Evidence is strong<br>1000-2000IU/day                                       |
| Siddiqui/ UAE                   | Centralized air-conditioning and transmission of novel coronavirus(118)                                                                         | D,R<br>3 pages              | Air conditioning<br>limits outdoor time                                     |
| Silberstein / Australia         | Vitamin D: A simpler alternative to tocilizumab for trial in COVID-19?(119)                                                                     | D,G,P,R,C<br>2 pages        | Biological<br>plausibility – study!                                         |
| Silberstein / Australia         | Premorbid IL-6 levels may predict mortality from COVID-19 (studied IL-6 levels, not vitamin D) (120)                                            | P,C<br>9 pages              | Correlation strong<br>Supplement all                                        |
| Siuka/ Slovenia                 | Vitamin D supplementation in the COVID-19 pandemic(121)                                                                                         | D,P,R,F,C<br>3 pages        | Supplement high-<br>risk, urgently                                          |
| Sparavigna/ Italy               | Vitamin D for Covid-19?(122)                                                                                                                    | D,R,C,<br>8 pages           | Lists literature - no<br>conclusion drawn                                   |
| Speckaert/ Belgium              | Association between low vitamin D and COVID-19: don't forget the vitamin D binding protein(123)                                                 | C,T<br>2 pages              | Decreases ARDs<br>Avoid deficiency                                          |
| Suresh/ India                   | Hypovitaminosis D and COVID-19: Matter of Concern in India?(124)                                                                                | D,G,P,R,C,S<br>2 pages      | Study, and correct<br>D deficiency                                          |
| Taheri/ Qatar                   | Managing diabetes in Qatar during the COVID-19 pandemic(125)                                                                                    | R<br>2 pages                | D is delivered to<br>diabetic patients                                      |
| Tan/ Singapore                  | Medications in COVID-19 patients: summarizing the current literature ... orthopaedic perspective(126)                                           | R,C,<br>5 pages             | Continue, but don't<br>add, B, C, and D                                     |
| Thomson/ UK                     | The COVID-19 Pandemic: A Global Natural Experiment(127)                                                                                         | (none)<br>6 pages           | Seasons allow<br>study of D impact                                          |
| Tian/ China                     | Letter: Covid-19, and vitamin D. Authors' reply (to Panarese)(128)                                                                              | G,R,J,C,T,S<br>2 pages      | Theory is sound<br>Supplement all                                           |
| Tian/ China                     | Letter: does vitamin D have a potential role against COVID-19? Authors' reply (to Kumar)(129)                                                   | R,C,T,<br>4 pages           | Theory is sound<br>Moderate doses                                           |
| Trinity College Dublin/ Ireland | News Release 12-May-2020 Vitamin D determines severity in COVID-19 so government advice needs to change(130)                                    | D,G,P,F,C<br>3 pages        | Irish government<br>should support<br>supplements and<br>food fortification |
| Turashvili/ Georgia             | Could vitamin D reduce the risk of COVID-19?(131)                                                                                               | G,P,R,C,S<br>5 pages        | Biological<br>plausibility – study!                                         |
| Uçar/                           | Koronavirüs ve fitoterapi(132)                                                                                                                  | R,C,                        | Boosts immunity                                                             |



|                                                                                          |                                                                                                                                        |                      |                                                                                                                              |
|------------------------------------------------------------------------------------------|----------------------------------------------------------------------------------------------------------------------------------------|----------------------|------------------------------------------------------------------------------------------------------------------------------|
| Turkey                                                                                   |                                                                                                                                        | 9 pages              | Give supplements                                                                                                             |
| Wang/<br>China                                                                           | Review of the 2019 novel coronavirus (SARS-CoV-2) based on current evidence(133)                                                       | R<br>7 pages         | Boosts immunity<br>Give supplements                                                                                          |
| Weir/<br>USA                                                                             | Does vitamin D deficiency increase the severity of COVID-19?(134)                                                                      | D,P,R,C,T<br>2 pages | Boosts immunity<br>Give modest doses                                                                                         |
| Wimalawansa/<br>USA                                                                      | Global epidemic of coronavirus—Covid-19: What can we do to minimize risks(135)                                                         | D,R,C,<br>7 pages    | Loading dose for all<br>200,000-300,000IU                                                                                    |
| Yong/<br>Malaysia                                                                        | Population Studies Confirm Risk Factors for Catching Covid-19(136) and Vitamin D as an Independent Risk Factor for COVID-19 Death(137) | F<br>5 & 10 pages    | Studies are compelling                                                                                                       |
| Yousfi/<br>Tunisia,<br>Italy,<br>Poland,<br>Canada,<br>Qatar                             | The COVID-19 pandemic: how to maintain a healthy immune ... special focus on athletes.(138)                                            | P,R,C,F<br>7 pages   | 10,000IU/day x1mo<br>then 5000IU/day                                                                                         |
| Zabetakis/<br>Ireland,<br>USA                                                            | COVID-19: The Inflammation Link and the Role of Nutrition in Potential Mitigation(139)                                                 | P,R<br>28 pages      | Uncertain if high doses required, but supplement                                                                             |
| Zemb/<br>France,<br>Sweden,<br>Belgium,<br>Italy, USA,<br>Austria,<br>Poland,<br>Romania | Vitamin D deficiency and COVID-19 pandemic(140)                                                                                        | D,P,R,<br>5 pages    | Immune benefits for other infections are known, but not for Covid-19. No harm found with 2000-4000IU, so why not supplement? |
| Zhang/<br>Japan,<br>China                                                                | Current status of potential therapeutic candidates for the COVID-19 crisis(141)                                                        | R,C                  | Studies including D are underway (not yet recommended)                                                                       |
| Zhang/<br>China                                                                          | Potential interventions for novel coronavirus in China: A systematic review(142)                                                       | D,G,P,R              | Could work to prevent                                                                                                        |
| Zicarelli/<br>Canada                                                                     | Nutrition Therapy ... (COVID-19): Recommendations ... for Integrative Medical Treatments(143)                                          | R,C,<br>9 pages      | Benefits patients<br>2000IU/day                                                                                              |

\* Supporting Information provided by these authors:

D = vitamin D deficiency is common

G = geographical observations (not data) of relationship between low vitamin D and high Covid-19

P = deficiency is more common in populations at higher risk for severe Covid-19 complications

Biological plausibility:

R = vitamin D enhances resistance to respiratory viruses, decreasing incidence of infection

F = vitamin D decreases overall fatalities from respiratory viruses; decreases Covid-19 severity

C = vitamin D suppresses pro-inflammatory cytokines implicated in severe Covid-19

J = vitamin D tightens junctions, helping prevent viral infections from progressing to pneumonia

T = vitamin D decreases the risk of thrombosis

S = vitamin D suppresses the 'Renin-Angiotensin' System activity, which is more of a problem for males

# of pages includes references, figures, and tables

#### References

1. Adams KK, Baker WL, Sobieraj DM. Myth Busters: Dietary Supplements and COVID-19. *Ann Pharmacother* (2020)1060028020928052. doi:10.1177/1060028020928052
2. Alabada HKM, Saleh WMM. Vitamin D effectiveness and pathology in humans and domestic animals. *Multi* (2020) **3**:15.
3. Álvarez-López JA, García-Contreras AI. Vitamina D y la pandemia por COVID-19. *RME* (2020) **7**:4329. doi:10.24875/RME.20000036
4. Anderson G, Reiter RJ. COVID-19 pathophysiology: interactions of gut microbiome, melatonin, vitamin D, stress, kynurenine and the alpha 7 nicotinic receptor: Treatment implications. *Melatonin Research* (2020) **3**:322–345. doi:10.32794/mr11250066
5. Annweiler C, Cao Z, Wu Y, Faucon E, Mouhat S, Kovacic H, Sabatier J-M. Counter-regulatory “Renin-Angiotensin” System-based Candidate Drugs to Treat COVID-19 Diseases in SARS-CoV-2-infected patients. *Infect Disord Drug Targets* (2020) doi:10.2174/1871526520666200518073329
6. Alpalhão M, Filipe P. SARS-CoV-2 pandemic and Vitamin D deficiency—A double trouble. *Photodermatology, Photoimmunology & Photomedicine* **n/a**: doi:10.1111/phpp.12579
7. Arboleda J, Urcuqui-Inchima S. Vitamin D supplementation: a potential approach for COVID-19 therapeutics? *Open Science Framework* (2020). doi:10.31219/osf.io/cgd4t
8. Ardaria M. PERAN VITAMIN D DALAM PENCEGAHAN INFLUENZA DAN COVID-19. *JNH (Journal of Nutrition and Health)* (2020) **8**:79–85. doi:10.14710/jnh.8.2.2020.79-85
9. Arya A, Dwivedi VD. Synergistic effect of Vitamin D and Remdesivir can fight COVID-19. *Journal of Biomolecular Structure and Dynamics* (2020) **0**:1–2. doi:10.1080/07391102.2020.1773929
10. Aslan MT, Aslan İÖ, Özdemir Ö. Is Vitamin D One of the Key Elements in COVID-19 Days? *J Nutr Health Aging* (2020) doi:10.1007/s12603-020-1413-5
11. Aygun H. Vitamin D can prevent COVID-19 infection-induced multiple organ damage. *Naunyn Schmiedebergs Arch Pharmacol* (2020) doi:10.1007/s00210-020-01911-4
12. Bakare TA, Soar JS. A cost-effective preventative approach to potentially save lives in the coronavirus pandemic, jointly using Vitamin D, Curcumin, and Vitamin C. *NutriXiv* (2020). doi:10.31232/osf.io/jgf6e
13. Barazzoni R, Bischoff SC, Breda J, Wickramasinghe K, Krznaric Z, Nitzan D, Pirlich M, Singer P. ESPEN expert statements and practical guidance for nutritional management of individuals with SARS-CoV-2 infection. *Clin Nutr* (2020) doi:10.1016/j.clnu.2020.03.022

14. Barron A, Patel N. Vitamin D: A rapid review of the evidence for treatment or prevention of COVID-19 in adults (excluding pregnant & breastfeeding women). London, UK: NIH (2020). Available at: <https://www.ncl-mon.nhs.uk/faq/guidelines/>
15. Bauer SR, Kapoor A, Rath M, Thomas SA. What is the role of supplementation with ascorbic acid, zinc, vitamin D, or N-acetylcysteine for prevention or treatment of COVID-19? *CCJM* (2020) doi:10.3949/ccjm.87a.ccc046
16. Belančić A, Kresović A, Rački V. Potential pathophysiological mechanisms leading to increased COVID-19 susceptibility and severity in obesity. *Obes Med* (2020) **19**:100259. doi:10.1016/j.obmed.2020.100259
17. Biesalski HK. Vitamin D deficiency and co-morbidities in COVID-19 patients – A fatal relationship? *NFS Journal* (2020) **20**:10–21. doi:10.1016/j.nfs.2020.06.001
18. Bloukh SH, Shaikh AA, Pathan HM, Edis Z. Prevalence of COVID-19: A Look behind the Scenes. (2020) doi:10.20944/preprints202004.0179.v2
19. Brown RA, Sarkar A. Vitamin D deficiency: a factor in COVID-19, progression, severity and mortality? – An urgent call for research. *Modern Ghana* (2020) Available at: <https://www.modernghana.com/news/992403/vitamin-d-deficiency-a-factor-in-covid-19-progre.html> [Accessed April 23, 2020]
20. Brown RA, Sarkar A. Vitamin D deficiency: a factor in COVID-19, progression, severity and mortality? – An urgent call for research. *MitoFit Preprint Arch* (2020) Available at: [https://www.mitofit.org/index.php/Brown\\_2020\\_MitoFit\\_Preprint\\_Arch](https://www.mitofit.org/index.php/Brown_2020_MitoFit_Preprint_Arch) [Accessed April 23, 2020]
21. Brown RA. Re: Preventing a covid-19 pandemic - COVID-19: Vitamin D deficiency; and, death rates; are both disproportionately higher in elderly Italians, Spanish, Swedish Somali, and African Americans? A connection? Research urgently required! *The BMJ* (2020) Available at: <https://www.bmj.com/content/368/bmj.m810/rr-46> [Accessed April 23, 2020]
22. Brown RA, Rhein H, Alipio MM, Annweiler C, Gnaiger E, Holick MF, Boucher BJ, Duque G, Féron F, Kenny RA, Montero-Odasso M, Minisola S, Rhodes J, Haq A, Bejerot S, Reiss LAJ, Zgaga L, Crawford MA, Fricker RA, Cobbold P, Lahore HW, Humble MB, Sakar A, Karras S, Iglesias-Gonzalez J, Gezen-Ak D, Dursun E, Cooper I, Grimes D, de Voil CWB,, McCarrison Society, La Route de Mont Cochon, St Lawrence, Jersey. COVID-19 'ICU' risk – 20-fold greater in the Vitamin D Deficient. BAME, African Americans, the Older, Institutionalised and Obese, are at greatest risk. Sun and 'D'-supplementation – Game-changers? Research urgently required. *BMJ* (2020) **2020**;369:m1548/rr-6: Available at: <https://www.bmj.com/content/369/bmj.m1548/rr-6> [Accessed June 24, 2020]
23. Buttriss JL, Lanham-New SA. Is a vitamin D fortification strategy needed? *Nutr Bull* (2020) **45**:115–122. doi:10.1111/nbu.12430
24. Caccialanza R, Laviano A, Lobascio F, Montagna E, Bruno R, Ludovisi S, Corsico AG, Di Sabatino A, Belliato M, Calvi M, et al. Early nutritional supplementation in non-critically ill patients hospitalized

for the 2019 novel coronavirus disease (COVID-19): Rationale and feasibility of a shared pragmatic protocol. *Nutrition* (2020)110835. doi:10.1016/j.nut.2020.110835

25. Calder PC, Carr AC, Gombart AF, Eggersdorfer M. Optimal Nutritional Status for a Well-Functioning Immune System Is an Important Factor to Protect against Viral Infections. *Nutrients* (2020) **12**: doi:10.3390/nu12041181
26. Cao Z, Wu Y, Faucon E, Sabatier J-M. SARS-CoV-2 & Covid-19: Key-Roles of the “Renin-Angiotensin” System / Vitamin D Impacting Drug and Vaccine Developments. *Infect Disord Drug Targets* (2020) doi:10.2174/1871526520999200505174704
27. Carter SJ, Baranauskas MN, Fly AD. Considerations for obesity, vitamin D, and physical activity amidst the COVID-19 pandemic. *Obesity (Silver Spring)* (2020) doi:10.1002/oby.22838
28. Chakhtoura M, Napoli N, El Hajj Fuleihan G. Commentary: Myths and facts on vitamin D amidst the COVID-19 pandemic. *Metabolism* (2020) **109**:154276. doi:10.1016/j.metabol.2020.154276
29. Chan B, Wong C, Leung PC. What can we do for the Personal Protection against the CoVID-19 Infection? Immuno-Boosting Specific Supplement could be the Answer. *J Emerg Med Trauma Surg Care* (2020) **2**:
30. Chhetri JK, Chan P, Arai H, Chul Park S, Sriyani Gunaratne P, Setiati S, Assantachai P. Prevention of COVID-19 in Older Adults: A Brief Guidance from the International Association for Gerontology and Geriatrics (IAGG) Asia/Oceania region. *J Nutr Health Aging* (2020) **24**:471–472. doi:10.1007/s12603-020-1359-7
31. Crane-Godreau MA, Clem KJ, Payne P, Fiering S. Vitamin D Deficiency and Air Pollution Exacerbate COVID-19 Through Suppression of Antiviral Peptide LL37. *Front Public Health* (2020) **8**: doi:10.3389/fpubh.2020.00232
32. Dasgupta J, Sen U, Bakshi A, Dasgupta A, Manna K, Saha C, De RK, Mukhopadhyay S, Bhattacharyya NP. Nsp7 and Spike Glycoprotein of SARS-CoV-2 Are Envisaged as Potential Targets of Vitamin D and Ivermectin. (2020) doi:10.20944/preprints202005.0084.v1
33. de Lucena TMC, da Silva Santos AF, de Lima BR, de Albuquerque Borborema ME, de Azevêdo Silva J. Mechanism of inflammatory response in associated comorbidities in COVID-19. *Diabetes Metab Syndr* (2020) **14**:597–600. doi:10.1016/j.dsx.2020.05.025
34. Dhillon P, Breuer M, Hirst N. COVID-19 breakthroughs: separating fact from fiction. *The FEBS Journal* (2020)
35. Docea AO, Tsatsakis A, Albulescu D, Cristea O, Zlatian O, Vinceti M, Moschos SA, Tsoukalas D, Goumenou M, Drakoulis N, et al. A new threat from an old enemy: Re-emergence of coronavirus (Review). *Int J Mol Med* (2020) **45**:1631–1643. doi:10.3892/ijmm.2020.4555
36. Ebadi M, Montano-Loza AJ. Perspective: improving vitamin D status in the management of COVID-19. *Eur J Clin Nutr* (2020) doi:10.1038/s41430-020-0661-0

37. Ekiz T, Pazarlı AC. Relationship between COVID-19 and obesity. *Diabetes & Metabolic Syndrome: Clinical Research & Reviews* (2020) **14**:761–763. doi:10.1016/j.dsx.2020.05.047
38. Ekiz T, Kara M, Özçakar L. Revisiting vitamin D and home-based exercises for patients with sleep apnea facing the COVID-19 quarantine. *J Clin Sleep Med* (2020) doi:10.5664/jcsm.8586
39. Fabbri A, Infante M, Ricordi C. Editorial - Vitamin D status: a key modulator of innate immunity and natural defense from acute viral respiratory infections. *Eur Rev Med Pharmacol Sci* (2020) **24**:4048–4052. doi:10.26355/eurrev\_202004\_20876
40. Facchiano A, Facchiano A, Bartoli M, Ricci A, Facchiano F. Reply to Jakovac: About COVID-19 and vitamin D. *Am J Physiol Endocrinol Metab* (2020) **318**:E838. doi:10.1152/ajpendo.00185.2020
41. Farias E dos S, Silva DF, Conceição VS da, Rocha AM. Vitamin D as an Immunological Factor in Combating COVID-19. *International Journal of Advanced Engineering Research and Science* (2020) **7**: Available at: <http://journal-repository.com/index.php/ijaers/article/view/2067> [Accessed June 16, 2020]
42. Froum S. Vitamin D and COVID-19 disease severity: An old ally in a new war. *Perio-Implant Advisory* (2020) Available at: <https://www.perioimplantadvisory.com/clinical-tips/article/14176684/vitamin-d-and-covid19-disease-severity-an-old-ally-in-a-new-war> [Accessed June 16, 2020]
43. Garami AR. Re: Preventing a covid-19 pandemic - Is there a magic bullet to save COVID-19 patients? We can give it a try! *BMJ (British Medical Journal)* (2020) **2020**;368:m810: Available at: <https://www.bmj.com/content/368/bmj.m810/rr-24> [Accessed May 10, 2020]
44. Garg M, Al-Ani A, Mitchell H, Hendy P, Christensen B. Editorial: low population mortality from COVID-19 in countries south of latitude 35 degrees North - supports vitamin D as a factor determining severity. Authors' reply. *Aliment Pharmacol Ther* (2020) doi:10.1111/apt.15796
45. Gasmi A, Noor S, Tippairote T, Dadar M, Menzel A, Bjørklund G. Individual risk management strategy and potential therapeutic options for the COVID-19 pandemic. *Clinical Immunology* (2020) **215**:108409. doi:10.1016/j.clim.2020.108409
46. Gee S, Gaughran F, MacCabe J, Shergill S, Whiskey E, Taylor D. Management of clozapine treatment during the COVID-19 pandemic: *Therapeutic Advances in Psychopharmacology* (2020) doi:10.1177/2045125320928167
47. Ghavideldarestani M, Honardoost M, Khamseh ME. Role of Vitamin D in Pathogenesis and Severity of COVID-19 Infection. (2020) doi:10.20944/preprints202004.0355.v1
48. Glinsky GV. Tripartite Combination of Candidate Pandemic Mitigation Agents: Vitamin D, Quercetin, and Estradiol Manifest Properties of Medicinal Agents for Targeted Mitigation of the COVID-19 Pandemic Defined by Genomics-Guided Tracing of SARS-CoV-2 Targets in Human Cells. *Biomedicines* (2020) **8**: doi:10.3390/biomedicines8050129

49. Vázquez--Tanus JB. COVID-19 Protocol. Puerto Rico: Vascular Nutrition PR Website (4/12/2020). Available at: <https://www.vascularnutritionpr.com/covid-19.html> [Accessed June 22, 2020]
50. Grant WB, Lahore H, McDonnell SL, Baggerly CA, French CB, Aliano JL, Bhattoa HP. Evidence that Vitamin D Supplementation Could Reduce Risk of Influenza and COVID-19 Infections and Deaths. *Nutrients* (2020) **12**:988. doi:10.3390/nu12040988
51. Grant WB, McDonnell SL. Letter in response to the article: Vitamin D concentrations and COVID-19 infection in UK biobank (Hastie et al.). *Diabetes & Metabolic Syndrome: Clinical Research & Reviews* (2020) **14**:893–894. doi:10.1016/j.dsx.2020.05.046
52. Grant WB, Baggerly CA, Lahore H. Reply: “Vitamin D Supplementation in Influenza and COVID-19 Infections. Comment on: Evidence That Vitamin D Supplementation Could Reduce Risk of Influenza and COVID-19 Infections and Deaths *Nutrients* 2020, 12(4), 988.” *Nutrients* (2020) **12**:1620. doi:10.3390/nu12061620
53. Guan H, Okely AD, Aguilar-Farias N, del Pozo Cruz B, Draper CE, El Hamdouchi A, Florindo AA, Jáuregui A, Katzmarzyk PT, Kontsevaya A, et al. Promoting healthy movement behaviours among children during the COVID-19 pandemic. *Lancet Child Adolesc Health* (2020) **4**:416–418. doi:10.1016/S2352-4642(20)30131-0
54. Gupta A. Is Immuno-modulation the Key to COVID-19 Pandemic? *Indian J Orthop* (2020)1–4. doi:10.1007/s43465-020-00121-7
55. Mohammed Hamad MN. Vitamin D Supplements Improve Efficacy of Minocycline, N-Acetylcysteine and Aspirin Triple Therapy to COVID-19 Infection. *SJBR* (2020) **05**:59–60. doi:10.36348/sjbr.2020.v05i04.005
56. Hasan A, Paray BA, Hussain A, Qadir FA, Attar F, Aziz FM, Sharifi M, Derakhshankhah H, Rasti B, Mehrabi M, et al. A review on the cleavage priming of the spike protein on coronavirus by angiotensin-converting enzyme-2 and furin. *J Biomol Struct Dyn* (2020) **0**:1–9. doi:10.1080/07391102.2020.1754293
57. Heiser K, McLean PF, Davis CT, Fogelson B, Gordon HB, Jacobson P, Hurst B, Miller B, Alfa RW, Earnshaw BA, et al. Identification of potential treatments for COVID-19 through artificial intelligence-enabled phenomic analysis of human cells infected with SARS-CoV-2. *bioRxiv* (2020)2020.04.21.054387. doi:10.1101/2020.04.21.054387
58. Hossain Z, Uddin MdN. Natural Polyphenol Engineering Field Crops based Diet to Promote Innate Immunity to Combat Covid-19 Disease. *AgriXiv* (2020). doi:10.31220/osf.io/da85c
59. Hribar CA, Cobbold PH, Church FC. Potential Role of Vitamin D in the Elderly to Resist COVID-19 and to Slow Progression of Parkinson’s Disease. *Brain Sci* (2020) **10**: doi:10.3390/brainsci10050284
60. Isaia G, Medico E. Possible prevention and therapeutic role of vitamin D in the management of the COVID-19 2020 pandemics. (2020) Available at:

[https://www.unitonews.it/storage/2515/8522/3585/lpovitaminosi\\_D\\_e\\_Coronavirus\\_25\\_marzo\\_2020.pdf](https://www.unitonews.it/storage/2515/8522/3585/lpovitaminosi_D_e_Coronavirus_25_marzo_2020.pdf)

61. Islam MR, Fischer A. A Transcriptome Analysis Identifies Potential Preventive and Therapeutic Approaches Towards COVID-19. (2020) doi:10.20944/preprints202004.0399.v1
62. Jakovac H. COVID-19 and vitamin D—Is there a link and an opportunity for intervention? *American Journal of Physiology-Endocrinology and Metabolism* (2020) **318**:E589–E589. doi:10.1152/ajpendo.00138.2020
63. Jayawardena R, Sooriyaarachchi P, Chourdakis M, Jeewandara C, Ranasinghe P. Enhancing immunity in viral infections, with special emphasis on COVID-19: A review. *Diabetes Metab Syndr* (2020) doi:10.1016/j.dsx.2020.04.015
64. Jukic I, Calleja-González J, Cos F, Cuzzolin F, Olmo J, Terrados N, Njaradi N, Sassi R, Requena B, Milanovic L, et al. Strategies and Solutions for Team Sports Athletes in Isolation due to COVID-19. *Sports (Basel)* (2020) **8**: doi:10.3390/sports8040056
65. Kakodkar P, Kaka N, Baig MN. A Comprehensive Literature Review on the Clinical Presentation, and Management of the Pandemic Coronavirus Disease 2019 (COVID-19). *Cureus* (2020) **12**:e7560. doi:10.7759/cureus.7560
66. Kalantar-Zadeh K, Moore LW. Impact of Nutrition and Diet on COVID-19 Infection and Implications for Kidney Health and Kidney Disease Management. *J Ren Nutr* (2020) **30**:179–181. doi:10.1053/j.jrn.2020.03.006
67. Kamani E. Effect of Low Level Yellow Laser Light 589nm on Virus Prevention Corona Virus (COVID-19). *OSP Journal of Case Reports* (2020) **2**:1–4. Available at: [https://www.ospublishers.com/Effect-of-Low-Level-Yellow-Laser-Light-589nm-on-Virus-Prevention-Corona-Virus-\(COVID-19\).html](https://www.ospublishers.com/Effect-of-Low-Level-Yellow-Laser-Light-589nm-on-Virus-Prevention-Corona-Virus-(COVID-19).html) [Accessed June 16, 2020]
68. Khalil I, Barma P. Sub-continental Atmosphere and Inherent Immune System may have Impact on Novel Corona Virus' 2019 (nCovid-19) Prevalence in South East Asia. *Mymensingh Med J* (2020) **29**:473–480.
69. Khunti K, Singh AK, Pareek M, Hanif W. Is ethnicity linked to incidence or outcomes of covid-19? *BMJ* (2020) **369**: doi:10.1136/bmj.m1548
70. Koenig HG. Ways of Protecting Religious Older Adults from the Consequences of COVID-19. *Am J Geriatr Psychiatry* (2020) doi:10.1016/j.jagp.2020.04.004
71. Kow CS, Hadi MA, Hasan SS. Vitamin D Supplementation in Influenza and COVID-19 Infections Comment on: "Evidence that Vitamin D Supplementation Could Reduce Risk of Influenza and COVID-19 Infections and Deaths" *Nutrients* 2020, 12(4), 988. *Nutrients* (2020) **12**: doi:10.3390/nu12061626

72. Kumar D, Gupta P, Banerjee D. Letter: does vitamin D have a potential role against COVID-19? *Aliment Pharmacol Ther* (2020) doi:10.1111/apt.15801
73. Kurthkoti K, Das G. Potential benefits of Vitamin D supplementation in COVID-19 patients: a hypothesis. *Open Science Framework* (2020). doi:10.31219/osf.io/dnjav
74. La Vignera S, Cannarella R, Condorelli RA, Torre F, Aversa A, Calogero AE. Sex-Specific SARS-CoV-2 Mortality: Among Hormone-Modulated ACE2 Expression, Risk of Venous Thromboembolism and Hypovitaminosis D. *Int J Mol Sci* (2020) **21**: doi:10.3390/ijms21082948
75. Lanham-New SA, Webb AR, Cashman KD, Buttriss JL, Fallowfield JL, Masud T, Hewison M, Mathers JC, Kiely M, Welch AA, et al. Vitamin D and SARS-CoV-2 virus/COVID-19 disease. *BMJ Nutrition, Prevention & Health* (2020)bmjnph-2020-000089. doi:10.1136/bmjnph-2020-000089
76. Lawton G. Will warmer spring weather slow down the rate of spread? *New Sci* (2020) **245**:8. doi:10.1016/S0262-4079(20)30659-X
77. Lee J, van Hecke O, Roberts N. Vitamin D: A rapid review of the evidence for treatment or prevention in COVID-19. *CEBM* Available at: <https://www.cebm.net/covid-19/vitamin-d-a-rapid-review-of-the-evidence-for-treatment-or-prevention-in-covid-19/> [Accessed May 4, 2020]
78. Manson JE. Does Vitamin D Protect Against COVID-19? *Medscape* (2020) Available at: <http://www.medscape.com/viewarticle/930152> [Accessed May 12, 2020]
79. Mansur J. Letter: low population mortality from COVID-19 in countries south of latitude 35 degrees North supports vitamin D as a factor determining severity. *Aliment Pharmacol Ther* (2020) doi:10.1111/apt.15820
80. Martín Giménez VM, Inserra F, Tajer CD, Mariani J, Ferder L, Reiter RJ, Manucha W. Lungs as target of COVID-19 infection: Protective common molecular mechanisms of vitamin D and melatonin as a new potential synergistic treatment. *Life Sci* (2020) **254**:117808. doi:10.1016/j.lfs.2020.117808
81. Maruta H, He H. PAK1-blockers: Potential Therapeutics against COVID-19. *Med Drug Discov* (2020) **6**:100039. doi:10.1016/j.medidd.2020.100039
82. McCartney DM, Byrne DG. Optimisation of Vitamin D Status for Enhanced Immuno-protection Against Covid-19. *Ir Med J* (2020) **113**:58.
83. McCartney DM, Byrne DG. McCartney et al comment on 'Covid-19, Cocooning and Vitamin D Requirements' response report – Irish Medical Journal. *Irish Medical Journal* (2020) **113**:80. Available at: <http://imj.ie/mccartney-et-al-comment-on-covid-19-cocooning-and-vitamin-d-requirements-response-report/> [Accessed May 14, 2020]
84. McCartney DM, Byrne DG. McCartney et al comment on 'Vitamin D and Covid-19 – A Note of Caution' response letter – Irish Medical Journal. *Irish Medical Journal* **113**:79. Available at: <http://imj.ie/mccartney-et-al-comment-on-vitamin-d-and-covid-19-a-note-of-caution-response-letter/> [Accessed May 14, 2020]



85. McCullough PJ, Amend J, McCullough WP, Repas SJ, Travers JB, Lehrer DS. The Essential Role of Vitamin D in the Biosynthesis of Endogenous Antimicrobial Peptides May Explain Why Deficiency Increases Mortality Risk in COVID-19 Infections. (2020) doi:10.20944/preprints202005.0265.v1
86. McKenna MJ, Flynn MAT. Covid-19 Cocooning and Vitamin D Intake Requirements – Irish Medical Journal. *Irish Medical Journal* (2020) **113**:79. Available at: <http://imj.ie/covid-19-cocooning-and-vitamin-d-intake-requirements/> [Accessed May 14, 2020]
87. Meftahi GH, Jangravi Z, Sahraei H, Bahari Z. The possible pathophysiology mechanism of cytokine storm in elderly adults with COVID-19 infection: the contribution of “inflamm-aging.” *Inflamm Res* (2020) doi:10.1007/s00011-020-01372-8
88. Merow C, Urban MC. Seasonality and uncertainty in COVID-19 growth rates. *medRxiv* (2020)2020.04.19.20071951. doi:10.1101/2020.04.19.20071951
89. Misra DP, Agarwal V, Gasparyan AY, Zimba O. Rheumatologists’ perspective on coronavirus disease 19 (COVID-19) and potential therapeutic targets. *Clin Rheumatol* (2020) doi:10.1007/s10067-020-05073-9
90. Mitchell F. Vitamin-D and COVID-19: do deficient risk a poorer outcome? *The Lancet Diabetes & Endocrinology* (2020) **0**: doi:10.1016/S2213-8587(20)30183-2
91. Molloy EJ, Murphy N. Vitamin D, Covid-19 and Children. *Ir Med J* (2020) **113**:64.
92. Muscogiuri G, Barrea L, Savastano S, Colao A. Nutritional recommendations for CoVID-19 quarantine. *European Journal of Clinical Nutrition* (2020) **74**:850–851. doi:10.1038/s41430-020-0635-2
93. Muscogiuri G, Pugliese G, Barrea L, Savastano S, Colao A. Obesity: the “Achilles heel” for COVID-19? *Metabolism* (2020) doi:10.1016/j.metabol.2020.154251
94. Musselwhite CBA. JTH editorial v17 – The importance of psychosocial factors in transport and health. *J Transp Health* (2020) doi:10.1016/j.jth.2020.100876
95. Nigro E, Polito R, Alfieri A, Mancini A, Imperlini E, Elce A, Krustrup P, Orrù S, Buono P, Daniele A. Molecular Mechanisms Involved in the Positive Effects of Physical Activity on Coping with COVID-19. (2020)
96. Nikhra V. Identifying Patterns in Covid-19: Morbidity, Recovery, and the Aftermath. (2020) doi:10.13140/RG.2.2.30040.93449
97. Nizami NS, Mujeebuddin CS. Strong Immunity - A Major Weapon to Fight against Covid-19. *IOSR Journal Of Pharmacy And Biological Sciences* (2020) **15**:22–29. doi:10.9790/1503032229
98. Pal R, Bhadada SK. Managing common endocrine disorders amid COVID-19 pandemic. *Diabetes & Metabolic Syndrome: Clinical Research & Reviews* (2020) **14**:767–771. doi:10.1016/j.dsx.2020.05.050

99. Palmer K, Monaco A, Kivipelto M, Onder G, Maggi S, Michel J-P, Prieto R, Sykara G, Donde S. The potential long-term impact of the COVID-19 outbreak on patients with non-communicable diseases in Europe: consequences for healthy ageing. *Aging Clin Exp Res* (2020) doi:10.1007/s40520-020-01601-4
100. Parvin F, Islam S, Urmay Z, Ahmed S. The symptoms, contagious process, prevention and post treatment of Covid-19. *European Journal of Physiotherapy and Rehabilitation Studies* (2020) **0**: Available at: <https://oapub.org/hlt/index.php/EJPRS/article/view/52> [Accessed May 8, 2020]
101. Pinnock D. Vitamin D and COVID-19. The Evidence Warrants Discussion! *The Medicinal Chef making health simple* (2020) Available at: <https://www.themedicinalchef.co.uk/vitamin-d-and-covid-19-the-evidence-warrants-discussion/> [Accessed June 25, 2020]
102. Queiroz NSF, Barros LL, de Azevedo MFC, Oba J, Sobrado CW, de Sousa Carlos A, Milani LR, Sipahi AM, Damião AOMC. Management of inflammatory bowel disease patients in the COVID-19 pandemic era: a Brazilian tertiary referral center guidance. *Clinics (Sao Paulo)* (2020) **75**: doi:10.6061/clinics/2020/e1909
103. Quesada-Gomez JM, Castillo ME, Bouillon R. Vitamin D Receptor stimulation to reduce Acute Respiratory Distress Syndrome (ARDS) in patients with Coronavirus SARS-CoV-2 infections: Revised Ms SBMB 2020\_166. *J Steroid Biochem Mol Biol* (2020)105719. doi:10.1016/j.jsbmb.2020.105719
104. Rabbitt L, Slattery E. Vitamin D and Covid-19 – A Note of Caution – Irish Medical Journal. *Irish Medical Journal* (2020) **113**:82. Available at: <http://imj.ie/vitamin-d-and-covid-19-a-note-of-caution/> [Accessed May 14, 2020]
105. Ramos EM, Abreu AC de, Freitas SLF de, Lima MD de, Reis FJM dos, Ramos HV, Souza ID de, Bochenek L de MS, Fonseca AC da, Nascimento VA do. COVID-19, Rate of Case Factors and Nutritional Characteristics of Patients Dying in Italy and Brazil: A Critical Analyze. *Global Journal of Health Science* (2020) **12**:p133. doi:10.5539/gjhs.v12n7p133
106. Raymond M, Ching-A-Sue G, Oliver VH. Mast cell stabilisers, leukotriene antagonists and antihistamines: A rapid review of effectiveness in COVID-19. *Centre for Evidence-Based Medicine* (2020) Available at: <https://covid19-evidence.paho.org/handle/20.500.12663/1569> [Accessed June 16, 2020]
107. Razdan K, Singh K, Singh D. Vitamin D Levels and COVID-19 Susceptibility: Is there any Correlation? *Medicine in Drug Discovery* (2020) **7**:100051. doi:10.1016/j.medidd.2020.100051
108. Rhodes JM, Subramanian S, Laird E, Anne Kenny R. Letter: low population mortality from COVID-19 in countries south of latitude 35 degrees North supports vitamin D as a factor determining severity. Authors' reply. *Aliment Pharmacol Ther* (2020) doi:10.1111/apt.15823
109. Ribeiro H, Santana KV de S de, Oliver SL, Rondó PH de C, Mendes MM, Charlton K, Lanham-New S. Does Vitamin D play a role in the management of Covid-19 in Brazil? *Revista de Saúde Pública* **54**: doi:10.11606/s1518-8787.2020054002545

110. Richards G, Mer M, Schleicher G, Stacey S. COVID-19 and the rationale for pharmacotherapy : a South African perspective. *Wits Journal of Clinical Medicine* (2020) **2**:11–18. doi:10.18772/26180197.2020.v2nSla2
111. Stuart Richer OD. How to build a lifestyle and nutritional firewall against viruses like COVID-19. *Optometry Times* (2020) **12**:1–7. Available at: <https://www.optometrytimes.com/article/how-build-lifestyle-and-nutritional-firewall-against-viruses-covid-19> [Accessed June 16, 2020]
112. Rocha JC, Calhau C, MacDonald A. Reply to Jakovac; Severity of COVID-19 infection in patients with phenylketonuria: is vitamin D status protective? *American Journal of Physiology-Endocrinology and Metabolism* (2020) **318**:E890–E891. doi:10.1152/ajpendo.00195.2020
113. Romano L, Bilotta F, Dauri M, Macheda S, Pujia A, De Santis GL, Tarsitano MG, Merra G, Di Renzo L, Esposito E, et al. Short Report - Medical nutrition therapy for critically ill patients with COVID-19. *Eur Rev Med Pharmacol Sci* (2020) **24**:4035–4039. doi:10.26355/eurrev\_202004\_20874
114. Roy AS, Matson M, Herlekar R. Response to 'Vitamin D concentrations and COVID-19 infection in UK Biobank.' *Diabetes & Metabolic Syndrome: Clinical Research & Reviews* (2020) **14**:777. doi:10.1016/j.dsx.2020.05.049
115. Rusciano D, Bagnoli P, Galeazzi R. The Fight Against COVID-19: The Role of Drugs and Food Supplements. *J Pharmacol Pharm Res* (2020) **3**:5–15. Available at: <https://researchopenworld.com/the-fight-against-covid-19-the-role-of-drugs-and-food-supplements/> [Accessed June 17, 2020]
116. Saul AW. Nutritional Treatment of Coronavirus. *Orthomolecular Medicine News Service* (2020) Available at: <http://orthomolecular.org/resources/omns/v16n06.shtml>
117. Sharma SK, Mudgal SK, Pai VS, Chaturvedi J, Gaur R. Vitamin D: A cheap yet effective bullet against coronavirus disease-19–Are we convinced yet? *National Journal of Physiology, Pharmacy and Pharmacology* (2020) **10**:0–0.
118. Siddiqui R, Ahmed Khan N. Centralized air-conditioning and transmission of novel coronavirus. *Pathog Glob Health* (2020)1–2. doi:10.1080/20477724.2020.1765653
119. Silberstein M. Vitamin D: A simpler alternative to tocilizumab for trial in COVID-19? *Med Hypotheses* (2020) **140**:109767. doi:10.1016/j.mehy.2020.109767
120. Silberstein M. Premorbid IL-6 levels may predict mortality from COVID-19. (2020) doi:10.21203/rs.3.rs-31814/v1
121. Siuka D, Pfeifer M, Pinter B. Vitamin D supplementation in the COVID-19 pandemic. *Mayo Clinic Proceedings* (2020) **0**: doi:10.1016/j.mayocp.2020.05.036
122. Sparavigna, Amelia Carolina. Vitamin D for Covid-19? *Politecnico Di Torino* (2020) doi:10.5281/ZENODO.3822187

123. Speeckaert MM, Delanghe JR. Association between low vitamin D and COVID-19: don't forget the vitamin D binding protein. *Aging Clin Exp Res* (2020) doi:10.1007/s40520-020-01607-y
124. Suresh PS. Hypovitaminosis D and COVID-19: Matter of Concern in India? *Ind J Clin Biochem* (2020) doi:10.1007/s12291-020-00894-6
125. Taheri S, Chagoury O, Tourette M, Skaroni I, Othman M, Bashir M, Dukhan K, Mohannadi DA, Hassan D, Ghadban W, et al. Managing diabetes in Qatar during the COVID-19 pandemic. *The Lancet Diabetes & Endocrinology* (2020) 0: doi:10.1016/S2213-8587(20)30154-6
126. Tan SHS, Hong CC, Saha S, Murphy D, Hui JH. Medications in COVID-19 patients: summarizing the current literature from an orthopaedic perspective. *Int Orthop* (2020) doi:10.1007/s00264-020-04643-5
127. Thomson B. The COVID-19 Pandemic: A Global Natural Experiment. *Circulation* (2020) doi:10.1161/CIRCULATIONAHA.120.047538
128. Tian Y, Rong L. Letter: Covid-19 and vitamin D-authors' reply. *Aliment Pharmacol Ther* (2020) doi:10.1111/apt.15764
129. Tian Y, Rong L. Letter: does vitamin D have a potential role against COVID-19? Authors' reply. *Aliment Pharmacol Ther* (2020) doi:10.1111/apt.15817
130. Trinity College Dublin. Vitamin D determines severity in COVID-19 so government advice needs to change. *EurekaAlert!* Available at: [https://www.eurekaalert.org/pub\\_releases/2020-05/tcd-vdd051220.php](https://www.eurekaalert.org/pub_releases/2020-05/tcd-vdd051220.php) [Accessed May 14, 2020]
131. Turashvili N, Javashvili L. Could vitamin D reduce the risk of COVID-19? *Translational and Clinical Medicine - Georgian Medical Journal* (2020) 5:4–6. Available at: <http://tcm.tsu.ge/index.php/TCM-GMJ/article/view/204> [Accessed May 8, 2020]
132. Uçar D, Tayfun K, Müslümanoğlu AY, Kalayci MZ. Coronavirus ve Fitoterapi. *Bütünleyici ve Anadolu Tıbbi Dergisi* (2020) 1:49–57. Available at: <https://dergipark.org.tr/en/pub/batd/711108> [Accessed May 20, 2020]
133. Wang L, Wang Y, Ye D, Liu Q. Review of the 2019 novel coronavirus (SARS-CoV-2) based on current evidence. *International Journal of Antimicrobial Agents* (2020)105948. doi:10.1016/j.ijantimicag.2020.105948
134. Weir EK, Thenappan T, Bhargava M, Chen Y. Does vitamin D deficiency increase the severity of COVID-19? *Clinical Medicine* (2020) doi:10.7861/clinmed.2020-0301
135. Wimalawansa SJ. Global epidemic of coronavirus—Covid-19: What can we do to minimize risks. *European Journal of Biomedical and Pharmaceutical Sciences* (2020) 7:7. Available at: [https://www.researchgate.net/profile/Sunil\\_Wimalawansa/publication/340102912\\_EJBPS-Prof\\_Wimalawansa-COVID-19-March\\_2020s/links/5e78eb434585158bd50069f3/EJBPS-Prof-Wimalawansa-COVID-19-March-2020s.pdf](https://www.researchgate.net/profile/Sunil_Wimalawansa/publication/340102912_EJBPS-Prof_Wimalawansa-COVID-19-March_2020s/links/5e78eb434585158bd50069f3/EJBPS-Prof-Wimalawansa-COVID-19-March-2020s.pdf)

136. Yong SJ. Population Studies Confirm Risk Factors for Catching Covid-19. *Medium* (2020) Available at: <https://medium.com/microbial-instincts/population-studies-confirm-risk-factors-for-catching-covid-19-853779e7a3c6> [Accessed June 26, 2020]
137. Yong SJ. Vitamin D as an Independent Risk Factor for COVID-19 Death. *Medium* (2020) Available at: <https://medium.com/microbial-instincts/lack-of-vitamin-d-as-an-independent-risk-factor-for-covid-19-death-82365d0520fa> [Accessed June 28, 2020]
138. Yousfi N, Bragazzi NL, Briki W, Zmijewski P, Chamari K. The COVID-19 pandemic: how to maintain a healthy immune system during the quarantine - a multidisciplinary approach with special focus on athletes. *bs* (2020) doi:10.5114/biolsport.2020.95125
139. Zabetakis I, Lordan R, Norton C, Tsoupras A. COVID-19: The Inflammation Link and the Role of Nutrition in Potential Mitigation. *Nutrients* (2020) **12**: doi:10.3390/nu12051466
140. Zemb P, Bergman P, Camargo CA, Cavalier E, Cormier C, Courbebaisse M, Hollis B, Minisola S, Pilz S, Pludowski P, et al. Vitamin D deficiency and COVID-19 pandemic. *J Glob Antimicrob Resist* (2020) doi:10.1016/j.jgar.2020.05.006
141. Zhang J, Xie B, Hashimoto K. Current status of potential therapeutic candidates for the COVID-19 crisis. *Brain Behav Immun* (2020) doi:10.1016/j.bbi.2020.04.046
142. Zhang L, Liu Y. Potential interventions for novel coronavirus in China: A systematic review. *J Med Virol* (2020) **92**:479–490. doi:10.1002/jmv.25707
143. Zicarelli vince. Nutrition Therapy for Severe Viral Infections (COVID-19): Recommendations and Considerations for Integrative Medical Treatments. *Journal of Orthomolecular Medicine* (2020) **35**: Available at: <https://isom.ca/article/nutrition-therapy-for-severe-viral-infections-covid-19/> [Accessed June 16, 2020]
