# Supplementary material for: A Basic Review of the Preliminary Evidence That COVID-19 Risk and Severity Is Increased in Vitamin D Deficiency
Source: PubMed Central journal article supplement (PMC7513835; doi:10.3389/fpubh.2020.00513), 2020-09-10
Supplement: Table_2.pdf [file Table_2.pdf]

**Table A2: Brief Summaries of Original Research (in vitro research is included in Table A1) (47 entries)**

| 1st Author /Location     | Title (Truncated)                                                                                          | Number of Participants /Type*/ #pages | Supporting Information** | Results/ Recommendation Regarding Covid-19                        | Support for Supplementation Now |
|--------------------------|------------------------------------------------------------------------------------------------------------|---------------------------------------|--------------------------|-------------------------------------------------------------------|---------------------------------|
| Ahmed/ UK                | First Covid-19 maternal mortality ...thrombotic complications(1)                                           | 1/CS<br>4 pages                       | T                        | Thrombosis kills/<br>Vigilance is needed                          | 5                               |
| Alipio/ Philippines      | Vitamin D ... possibly improve clinical outcomes of patients infected with ... (Covid-2019)(2)             | 212/R<br>6 pages                      | R,C                      | Sig. D-outcome link /D suppl. could improve outcomes              | 8                               |
| Alipio/ Philippines      | Do latitude and ozone concentration predict Covid-2019 cases in 34 countries?(3)                           | 34 countries /A<br>9 pages            | R,                       | Sig Covid-19-UV (D) link, no latitude link /D suppl. indicated    | 7                               |
| Annweiler/France & China | Point of view: Should COVID-19 patients be supplemented with vitamin D?(4)                                 | 6 of 7 causal criteria/C<br>25 pages  | G,P,R,F,C,J,S            | Strong biological plausibility case - supplement D                | 9                               |
| Asyary/ Indonesia        | Sunlight exposure increased Covid-19 recovery rates: A study in ... Indonesia(5)                           | 9 hospitals /R<br>4 pages             | G,I,R,F,                 | Patient exposure to sunshine helped Encourage it                  | 7                               |
| Bäcker/ USA (see note)   | Why COVID-19 May Be Disproportionately Killing African Americans...Irradiance... Income(6)                 | 8 locations in the USA/ A<br>6 pages  | G,I                      | Irradiation for disinfection, sun for protection                  | 6                               |
| Bäcker/ USA (see note)   | Slower COVID-19 morbidity and mortality growth at higher solar irradiance and elevation(7)                 | 159 locations/A<br>21 pages           | G,I,                     | Encourage people to go where the sun is overhead                  | 6                               |
| ann/ USA (see note)      | Non-black Hispanic/Latinos Spend More Time Outdoors ... Lower ... Morbidity Than Non-Hispanic...(8)        | All of Georgia /A<br>7 pages          | G,I,P                    | Urgently test sunlight exposure, especially for African Americans | 6                               |
| Bäcker/ USA              | Double COVID-19 ... Fatality Rate in Countries with High Elderly Female Vitamin D Deficiency Prevalence(9) | 32 countries /A<br>11 pages 1         | G,I,P,C,S                | Test Vitamin D for prevention and treatment                       | 6                               |

|                              |                                                                                                                                 |                                          |                |                                                                     |   |
|------------------------------|---------------------------------------------------------------------------------------------------------------------------------|------------------------------------------|----------------|---------------------------------------------------------------------|---|
| Bossoni/ Italy               | Severe hypocalcemia in a thyroidectomized woman with Covid-19 infection(10)                                                     | 1/CS<br>2 pages                          | R              | Warn thyroid patients due to home confinement                       | 8 |
| Braiman/ USA                 | Latitude ... COVID-19 mortality rate—a possible relationship to vitamin D deficiency?(11)                                       | all nations (WHO data)<br>P/ 14 pages    | G              | Test for link by supplementing and looking for changes              | 7 |
| Cuñat/ Spain                 | Vitamin D deficiency in critically ill patients ... COVID -19. Are we doing enough? ... 226 patients.(12)                       | 226 patients (subset: 17)<br>/R/7 pages  | P,R,C,S        | Should assess D more often – all 17 were deficient                  | 8 |
| Daneshkhah/USA               | The Possible Role of Vitamin D in Suppressing Cytokine Storm and ... Mortality in COVID-19 Patients(13)                         | 10 countries<br>/A/<br>23 pages          | C              | Study if Vitamin D deficiency speeds mortality                      | 6 |
| Darling /UK                  | Vitamin D status, body mass index, ethnicity and COVID-19: ... UK Biobank COVID-19 ...(n 580) ... negative controls (n 723)(14) | 580 Covid+ vs 580 negative /R<br>3 pages | None mentioned | All identified risk factors are uncontrollable - No recommendations | 0 |
| Davies/UK Switzerland        | Evidence Supports a Causal Model for Vitamin D in COVID-19 Outcomes(15) (two studies)                                           | Global data<br>/A and C/<br>30 pages     | G,P,R          | D deficiency is a cause of Covid-19<br>Give up to 4000IU            | 9 |
| D'Avolio/ Switzerland, Italy | 25-Hydroxyvitamin D ..Are Lower in Patients with Positive PCR for SARS-CoV-2(16)                                                | 107 Covid+ vs 1377 /R/<br>7 pages        | R              | D correlated to + Supplements urged as per Grant, et al.            | 9 |
| De Smet/ Belgium             | Vitamin D deficiency as risk factor for severe 1 COVID-19: a convergence of two pandemics(17)                                   | 186 Covid+ vs 2717 /R/<br>23 pages       | D,P,R,C,       | Deficiency seems to cause severe, supplements urged                 | 9 |
| Fasano/ Italy, Canada        | COVID-19 in Parkinson's Disease Patients Living in ... Italy(18)                                                                | 105 Covid+ vs 1381/S/<br>12 pages        | G,C            | Parkinson's doesn't matter; D does. Conduct D studies               | 7 |
| Faul/ Ireland                | Vitamin D Deficiency and ARDS after SARS-CoV-2 Infection(19)                                                                    | 33 Covid+ S/ 2 pages                     | D,C            | Worse outcomes in men with lower D                                  | 7 |

|                                     |                                                                                                                           |                                                  |                |                                                                    |    |
|-------------------------------------|---------------------------------------------------------------------------------------------------------------------------|--------------------------------------------------|----------------|--------------------------------------------------------------------|----|
| Fox/ USA                            | No Association ...Between Vitamin D Deficiency and COVID-19 Infection, Hospitalization, or Mortality(20)                  | 28,185 patients<br>3 pages                       | None mentioned | No difference with deficiency, but authors call for better studies | 0  |
| Ghasemian/ Iran, Australia, Russia, | The Role of Vitamin D in The Age of COVID-19: A Systematic Review and Meta-Analysis Along with an Ecological Approach(21) | 9 studies (subset:6)<br>51 countries<br>20 pages | G,P,R,C,       | Patients with Covid-19 lacked D, slight country link<br>Need RCTs  | 6  |
| Glicio/ India                       | Vitamin D Level of Mild and Severe Elderly Cases of COVID-19...(22)                                                       | 176 Covid+<br>18 pages                           | P,R,C,         | Link is suggested Supplement elderly                               | 6  |
| Hastie/ UK                          | Vitamin D concentrations and COVID-19 infection in UK Biobank(23)                                                         | 449 Covid+ vs 348,149 R/5 pages                  | G,P,           | Link attributed to confounds – D has no role in Covid-19           | 0  |
| Horowitz/ USA                       | Efficacy of glutathione ..dyspnea ... COVID-19 pneumonia ... 2 cases(24)                                                  | 2 (1 D)<br>8 pages                               | None mentioned | One patient had D deficiency                                       | 5  |
| Ilie/UK                             | The role of vitamin D in the prevention of coronavirus disease 2019 infection and mortality(25)                           | 20 countries /P/<br>4 pages                      | D,G,P,R,C,S    | Recommend study comparing D levels & Covid-19 severity             | 6  |
| Kara/Italy,Turkey, Taiwan           | 'Scientific Strabismus' or Two Related Pandemics COVID-19 & Vitamin D Deficiency(26)                                      | 40 countries /P/<br>6 pages                      | D,G,P,R,S      | Goal 40-60ng/ml 10,000IU/day x1mo then 5000IU/day                  | 10 |
| Kohlmeier/ USA                      | Avoidance of vitamin D deficiency to slow the COVID-19 pandemic(27)                                                       | 22 states/A/<br>7 pages                          | D,G,P,R,C      | Precision nutrition RDA - <4000IU/Day                              | 8  |
| Kumar/ India                        | Spurious Correlation? A review of the relationship ... Vitamin D and Covid-19 infection & mortality(28)                   | 20 countries /P/<br>7 pages                      | None mentioned | Ilie is wrong – no role for vitamin D<br>Overdose is likely        | 0  |
| Laird/ UK, Ireland                  | Vitamin D and Inflammation: Potential                                                                                     | 12 countries /P/                                 | D,P,G,R,C,S    | Correlation exists<br>Publicize D                                  | 6  |

|                       |                                                                                                         |                                       |               |                                                                   |    |
|-----------------------|---------------------------------------------------------------------------------------------------------|---------------------------------------|---------------|-------------------------------------------------------------------|----|
|                       | Implications for Severity of Covid-19(29)                                                               | 7 pages                               |               | recommendations                                                   |    |
| Lau/USA               | Vitamin D insufficiency is prevalent in severe COVID-19(30)                                             | 20 Covid+ R/14 pages                  | G,P,R,C,T     | Worse with low D Study D further                                  | 6  |
| Li/ China, USA        | Identifying novel factors ... COVID-19 using ...machine learning(31)                                    | A (machine) 32 pages                  | Not discussed | D is independent risk factor for cases                            | 7  |
| Li/USA                | Multivariate Analysis of Factors Affecting COVID-19 ...U.S. Counties: ...Black Race and Temperature(32) | 661 & 217 counties A/ 21 pages        | D,P,R,C       | D is a likely factor Conducting studies Supplement all            | 7  |
| Li/USA, China         | Sunlight and vitamin D in ... (COVID-19) infection and mortality ...(33)                                | 49 states A/ 15 pages                 | D,G,P,R,C,    | Appears related Need more studies                                 | 6  |
| Marik/ USA            | Does vitamin D status impact mortality from SARS-CoV-2 ...?(34)                                         | 50 states A/ 2 pages                  | G,P,R,C       | Appears related Standard dosages                                  | 6  |
| Meltzer/ USA          | Association of Vitamin D Deficiency ... Treatment with COVID-19 ...(35)                                 | 499 patients R/ 22 pages              | D,G,P,R,C     | D decreases risk 4000-5000IU/day                                  | 10 |
| Moozhipurath/ Germany | Evidence of Protective Role of Ultraviolet-B (UVB) Radiation in Reducing COVID-19 Deaths(36)            | 152 affected countries/A/ 42 pages    | R,C,F         | D decreases deaths Encourage time in sun for deficient            | 6  |
| Notari/ Spain, Brazil | COVID-19 transmission risk factors(37)                                                                  | 126 countries, 24 factors A/ 42 pages | R             | Independent risk: Type 1 diabetes, BCG vaccination, and vitamin D | 7  |
| Panarese/ Italy       | Letter: Covid-19, and vitamin D (response to Tian, et al. Gastro)(38)                                   | 108countries A/3 pages                | G,P,R,C,S     | Immune control 2000IU/day                                         | 8  |
| Pinzon/ Indonesia     | Vitamin D Deficiency ... Patients with COVID-19 : Case Series and Recent Literature Review(39)          | 10 patients CS 9 pages                | D,G,P,R,C     | Immune benefits They give all patients 2000IU                     | 8  |
| Raharusuna/ Indonesia | Patterns of COVID-19 Mortality and Vitamin D: An Indonesian Study(40)                                   | 780 patients R 14 pages               | R,C           | D is strongly associated with death – do RCTs                     | 8  |

|                                      |                                                                                                                                                                 |                                                  |               |                                                                        |   |
|--------------------------------------|-----------------------------------------------------------------------------------------------------------------------------------------------------------------|--------------------------------------------------|---------------|------------------------------------------------------------------------|---|
| Raisi-Estabragh/ UK                  | Greater risk of severe COVID-19 in non-White ethnicities is not explained by ...vitamin D status: study of 1,326 ... UK Biobank(41)                             | Hospitalized 1326 + 3184 - R/ 21 pages           | Not discussed | Ruled out cardio-metabolic, social, behavior, and D – leaving genetic? | 0 |
| Rhodes/ UK                           | Editorial: low population mortality ...south of latitude 35 degrees North supports vitamin D ...(42)                                                            | 120 countries A/ 4 pages                         | D,P,C,        | Could protect from cytokine storm 1000IU/day                           | 7 |
| Singh/ India                         | Revisiting the role of vitamin D ... prevention and mortality in European ...post peak(43)                                                                      | 20 countries 2 dates A/ 8 pages                  | R,C,S         | D influenced cases more than deaths study ? of giving D                | 3 |
| Skutsch/Netherlands, Mexico, Germany | The association of UV with rates of COVID-19 transmission and deaths in Mexico: the possible mediating role of vitamin D(44)                                    | 45 cities in Mexico A/ 29 pages                  | D,P,R,C,      | Further study of link between UV (vitamin D) and transmission rates    | 6 |
| Sun/ China                           | Serum calcium as a biomarker of clinical severity and prognosis...(45)                                                                                          | 241 patients P/18 pages                          | not discussed | Deficiency suggests larger studies                                     | 7 |
| Tan/ Singapore                       | A cohort study to evaluate the effect of combination Vitamin D, Magnesium and Vitamin B12 (DMB) on progression to severe outcome in older COVID-19 patients(46) | 43 patients 26 controls 17 supplement R/ 6 pages | R,C           | Give combination earlier to all cases and to high risk contacts        | 9 |
| Yao/ China                           | No Association of COVID-19 transmission with temperature or UV radiation in Chinese cities(47)                                                                  | 224 cities in China/ G/ 9 pages                  | G,R           | UV (therefore D) not related to transmission                           | 0 |

\*Type of Study

A = Analyses of population data or latitude data (geographic)

C = Causal inference modeling report, Hill's methodology for exploring causality, etc.

P = Prospective correlational study

R = Retrospective chart (or data) review

CS = Single or Multiple Case Study

\*\* Supporting Information provided by these authors:

G = geographical observations (not research) of relationship between low vitamin D and high Covid-19

I = Irradiance in the geographic area influences vitamin D deficiency

Biological plausibility:

R = vitamin D enhances resistance to respiratory viruses, decreasing incidence of infection

F = vitamin D decreases overall fatalities from respiratory viruses

C = vitamin D suppresses cytokines that are implicated in severe Covid-19

J = vitamin D tightens junctions, helping prevent viral infections from progressing to pneumonia

T = vitamin D decreases the risk of thrombosis

S = vitamin D suppresses the 'Renin-Angiotensin' System activity, which is more of a problem for males

Note: Content from an earlier preprint by Bäcker, Follow the Sun: Slower COVID-19 morbidity and mortality growth at higher irradiances, <https://ssrn.com/abstract=3567587>, last revised 13 April 2020, appears to have been divided into the two much more complete and more recently revised articles included here in Table 3. Similarly, Bäcker's preprint, Non-black Latinos Spend More Time Outdoors and Have Lower COVID-19 Morbidity and Case Fatality Rates Than Non-Latinos, last revised April 16, appears to have been completely incorporated into a similar work, Non-black Hispanic/Latinos Spend More Time Outdoors and Have Lower COVID-19 Morbidity Than Non-Hispanic/Latinos, Last revised April 20, 2020.

#### References

1. Ahmed I, Azhar A, Eltaweel N, Tan BK. First Covid-19 maternal mortality in the UK associated with thrombotic complications. *Br J Haematol* (2020) doi:10.1111/bjh.16849
2. Alipio M. Vitamin D Supplementation Could Possibly Improve Clinical Outcomes of Patients Infected with Coronavirus-2019 (COVID-2019). Rochester, NY: Social Science Research Network (2020). doi:10.2139/ssrn.3571484
3. Alipio MM. Do latitude and ozone concentration predict Covid-2019 cases in 34 countries? *medRxiv* (2020)2020.04.09.20060202. doi:10.1101/2020.04.09.20060202
4. Annweiler C, Cao Z, Sabatier J-M. Point of view: Should COVID-19 patients be supplemented with vitamin D? *Maturitas* (2020) **140**:24–26. doi:10.1016/j.maturitas.2020.06.003
5. Asyary A, Veruswati M. Sunlight exposure increased Covid-19 recovery rates: A study in the central pandemic area of Indonesia. *Sci Total Environ* (2020) doi:10.1016/j.scitotenv.2020.139016
6. Bäcker A. Why COVID-19 May Be Disproportionately Killing African Americans: Black Overrepresentation among COVID-19 Mortality Increases with Lower Irradiance, Where Ethnicity Is More Predictive of COVID-19 Infection and Mortality Than Median Income. Social Science Research Network (2020). doi:10.2139/ssrn.3571699
7. Bäcker A. Slower COVID-19 Morbidity and Mortality Growth at Higher Solar Irradiance and Elevation. Rochester, NY: Social Science Research Network (2020). doi:10.2139/ssrn.3604729
8. Bäcker A. Non-black Hispanic/Latinos Spend More Time Outdoors and Have Lower COVID-19 Morbidity Than Non-Hispanic/Latinos. Rochester, NY: Social Science Research Network (2020). doi:10.2139/ssrn.3575217

9. Bäckér A, Mageswaran M. Double COVID-19 Confirmed Case Fatality Rate in Countries with High Elderly Female Vitamin D Deficiency Prevalence. Rochester, NY: Social Science Research Network (2020). doi:10.2139/ssrn.3623662
10. Bossoni S, Chiesa L, Giustina A. Severe hypocalcemia in a thyroidectomized woman with Covid-19 infection. *Endocrine* (2020)1–2. doi:10.1007/s12020-020-02326-0
11. Braiman M. Latitude Dependence of the COVID-19 Mortality Rate—A Possible Relationship to Vitamin D Deficiency? Rochester, NY: Social Science Research Network (2020). doi:10.2139/ssrn.3561958
12. Cuñat T, Ojeda A, Calvo A. Vitamin D deficiency in critically ill patients diagnosed with COVID -19. Are we doing enough? A retrospective analysis of 226 patients. In Review (2020). doi:10.21203/rs.3.rs-30390/v1
13. Daneshkhah A, Agrawal V, Eshein A, Subramanian H, Roy HK, Backman V. The Possible Role of Vitamin D in Suppressing Cytokine Storm and Associated Mortality in COVID-19 Patients. *medRxiv* (2020)2020.04.08.20058578. doi:10.1101/2020.04.08.20058578
14. Darling AL, Ahmadi KR, Ward KA, Harvey NC, Alves AC, Dunn-Waters DK, Lanham-New SA, Cooper C, Blackburn DJ. Vitamin D status, body mass index, ethnicity and COVID-19: Initial analysis of the first-reported UK Biobank COVID-19 positive cases (n 580) compared with negative controls (n 723). *medRxiv* (2020)2020.04.29.20084277. doi:10.1101/2020.04.29.20084277
15. Davies G, Garami AR, Byers JC. Evidence Supports a Causal Model for Vitamin D in COVID-19 Outcomes. *medRxiv* (2020)2020.05.01.20087965. doi:10.1101/2020.05.01.20087965
16. D’Avolio A, Avataneo V, Manca A, Cusato J, De Nicolò A, Lucchini R, Keller F, Cantù M. 25-Hydroxyvitamin D Concentrations Are Lower in Patients with Positive PCR for SARS-CoV-2. *Nutrients* (2020) **12**: doi:10.3390/nu12051359
17. De Smet D, De Smet K, Herroelen P, Gryspeerdt S, Martens GA. Vitamin D deficiency as risk factor for severe COVID-19: a convergence of two pandemics. *medRxiv* (2020)2020.05.01.20079376. doi:10.1101/2020.05.01.20079376
18. Fasano A, Cereda E, Barichella M, Cassani E, Ferri V, Zecchinelli AL, Pezzoli G. COVID-19 in Parkinson’s Disease Patients Living in Lombardy, Italy. *Mov Disord* (2020) doi:10.1002/mds.28176
19. Faul JL, Kerley C, Love B, O-Nell E, Cody C, Tormey W, Hutchinson K, Cormican LJ, Burke CM. Vitamin D Deficiency and ARDS after SARS-CoV-2 Infection – Irish Medical Journal. *Irish Medical Journal* (2020) **113**:84. Available at: <http://imj.ie/vitamin-d-deficiency-and-ards-after-sars-cov-2-infection/> [Accessed May 14, 2020]
20. Fox B, Sizemore JO. No Association Seen Between Vitamin D Deficiency and COVID-19 Infection, Hospitalization, or Mortality.
21. Ghasemian R, Shamshirian A, Heydari K, Malekan M, Alizadeh-Navaei R, Ebrahimzadeh MA, Jafarpour H, Shahmirzadi AR, Khodabandeh M, Seyfari B. The Role of Vitamin D in The Age of COVID-19: A Systematic Review and Meta-Analysis Along with an Ecological Approach. *medRxiv* (2020)

22. Glicio EJ. Vitamin D Level of Mild and Severe Elderly Cases of COVID-19: A Preliminary Report. Rochester, NY: Social Science Research Network (2020). Available at: <https://papers.ssrn.com/abstract=3593258> [Accessed May 20, 2020]
23. Hastie CE, Mackay DF, Ho F, Celis-Morales CA, Katikireddi SV, Niedzwiedz CL, Jani BD, Welsh P, Mair FS, Gray SR, et al. Vitamin D concentrations and COVID-19 infection in UK Biobank. *Diabetes & Metabolic Syndrome: Clinical Research & Reviews* (2020) **14**:561–565. doi:10.1016/j.dsx.2020.04.050
24. Horowitz RI, Freeman PR, Bruzzese J. Efficacy of glutathione therapy in relieving dyspnea associated with COVID-19 pneumonia: A report of 2 cases. *Respiratory Medicine Case Reports* (2020) **30**:101063. doi:10.1016/j.rmcr.2020.101063
25. Ilie PC, Stefanescu S, Smith L. The role of Vitamin D in the prevention of Coronavirus Disease 2019 infection and mortality. In Review (2020). doi:10.21203/rs.3.rs-21211/v1
26. Kara M, Ekiz T, Ricci V, Kara Ö, Chang K-V, Özçakar L. “Scientific Strabismus” or Two Related Pandemics: COVID-19 & Vitamin D Deficiency. *Br J Nutr* (2020)1–20. doi:10.1017/S0007114520001749
27. Kohlmeier M. Avoidance of vitamin D deficiency to slow the COVID-19 pandemic. *BMJ Nutrition, Prevention & Health* (2020)bmjnph-2020-000096. doi:10.1136/bmjnph-2020-000096
28. Kumar V, Srivastava A. Spurious Correlation? A review of the relationship between Vitamin D and Covid-19 infection and mortality. *medRxiv* (2020)2020.05.25.20110338. doi:10.1101/2020.05.25.20110338
29. Laird E, Rhodes J, Kenny RA. Vitamin D and Inflammation – Potential Implications for Severity of Covid-19 – Irish Medical Journal. *Irish Medical Journal* (2020) **113**:81. Available at: <http://imj.ie/vitamin-d-and-inflammation-potential-implications-for-severity-of-covid-19/> [Accessed May 14, 2020]
30. Lau FH, Majumder R, Torabi R, Saeg F, Hoffman R, Cirillo JD, Greiffenstein P. Vitamin D Insufficiency is Prevalent in Severe COVID-19. *medRxiv* (2020)2020.04.24.20075838. doi:10.1101/2020.04.24.20075838
31. Li M, Zhang Z, Cao W, Liu Y, Du B, Chen C, Liu Q, Uddin MN, Jiang S, Chen C, et al. Identifying novel factors associated with COVID-19 transmission and fatality using the machine learning approach. *medRxiv* (2020)2020.06.10.20127472. doi:10.1101/2020.06.10.20127472
32. Li AY, Hannah TC, Durbin J, Dreher N, McAuley FM, Marayati NF, Spiera Z, Ali M, Gometz A, Kostman JT, et al. Multivariate Analysis of Factors Affecting COVID-19 Case and Death Rate in U.S. Counties: The Significant Effects of Black Race and Temperature. *medRxiv* (2020)2020.04.17.20069708. doi:10.1101/2020.04.17.20069708
33. Li Y, Li Q, Zhang N, Liu Z. Sunlight and vitamin D in the prevention of coronavirus disease (COVID-19) infection and mortality in the United States. (2020)
34. Marik PE, Kory P, Varon J. Does vitamin D status impact mortality from SARS-CoV-2 infection? *Med Drug Discov* (2020)100041. doi:10.1016/j.medidd.2020.100041
35. Meltzer DO, Best TJ, Zhang H, Vokes T, Arora V, Solway J. Association of Vitamin D Deficiency and Treatment with COVID-19 Incidence. *medRxiv* (2020)2020.05.08.20095893. doi:10.1101/2020.05.08.20095893



36. Moozhipurath RK, Kraft L, Skiera B. Evidence of Protective Role of Ultraviolet-B (UVB) Radiation in Reducing COVID-19 Deaths. *medRxiv* (2020)2020.05.06.20093419. doi:10.1101/2020.05.06.20093419
37. Notari A, Torrieri G. COVID-19 transmission risk factors. *arXiv:200503651 [physics, q-bio, stat]* (2020) Available at: <http://arxiv.org/abs/2005.03651> [Accessed May 20, 2020]
38. Panarese A, Shahini E. Letter: Covid-19, and vitamin D. *Aliment Pharmacol Ther* (2020) doi:10.1111/apt.15752
39. Pinzon RT, Angela A, Pradana AW. Vitamin D Deficiency Among Patients with COVID-19 : Case Series and Recent Literature Review. In Review (2020). doi:10.21203/rs.3.rs-29473/v1
40. Raharusun P, Priambada S, Budiarti C, Agung E, Budi C. Patterns of COVID-19 Mortality and Vitamin D: An Indonesian Study. Rochester, NY: Social Science Research Network (2020). doi:10.2139/ssrn.3585561
41. Raisi-Estabragh Z, McCracken C, Bethell MS, Cooper J, Cooper C, Caulfield MJ, Munroe PB, Harvey NC, Petersen SE. Greater risk of severe COVID-19 in non-White ethnicities is not explained by cardiometabolic, socioeconomic, or behavioural factors, or by 25(OH)-vitamin D status: study of 1,326 cases from the UK Biobank. *medRxiv* (2020)2020.06.01.20118943. doi:10.1101/2020.06.01.20118943
42. Rhodes JM, Subramanian S, Laird E, Kenny RA. Editorial: low population mortality from COVID-19 in countries south of latitude 35 degrees North – supports vitamin D as a factor determining severity. *Alimentary Pharmacology & Therapeutics* n/a: doi:10.1111/apt.15777
43. Singh S, Kaur R, Singh RK. Revisiting the role of vitamin D levels in the prevention of COVID-19 infection and mortality in European countries post infections peak. (2020) doi:10.21203/rs.3.rs-32484/v1
44. Skutsch M, Dobler C, McCall MBB, Ghilardi A, Salinas-Melgoza MA, McCall MK, Fenner-Sanchez G. The association of UV with rates of COVID-19 transmission and deaths in Mexico: the possible mediating role of vitamin D. *medRxiv* (2020)2020.05.25.20112805. doi:10.1101/2020.05.25.20112805
45. Sun J-K, Zhang W-H, Zou L, Liu Y, Li J-J, Kan X-H, Dai L, Shi Q-K, Yuan S-T, Yu W-K, et al. Serum calcium as a biomarker of clinical severity and prognosis in patients with coronavirus disease 2019: a retrospective cross-sectional study. In Review (2020). doi:10.21203/rs.3.rs-17575/v1
46. Tan CW, Ho LP, Kalimuddin S, Cherg BPZ, Teh YE, Thien SY, Wong HM, Tern PJW, Chay JWM, Nagarajan C, et al. A cohort study to evaluate the effect of combination Vitamin D, Magnesium and Vitamin B12 (DMB) on progression to severe outcome in older COVID-19 patients. *medRxiv* (2020)2020.06.01.20112334. doi:10.1101/2020.06.01.20112334
47. Yao Y, Pan J, Liu Z, Meng X, Wang W, Kan H, Wang W. No Association of COVID-19 transmission with temperature or UV radiation in Chinese cities. *Eur Respir J* (2020) doi:10.1183/13993003.00517-2020
